# Supplementary material
Source: publisher figshare collection journal article supplement (https://future-science-group.figshare.com/ndownloader/files/31127650)
Supplement: Supplementary file 1 [file 31127650]

## Sheet: t_gene_expression
Supplementary Table 3. The differential expression profile for PD patients by RNAseq
Chr	gene_symbol	tissue	fold_change	p_value	regulation	detecting_method	pubMed_ID
-	A2ML1	prefrontal cortex	0.48	0.0024	UP	RNA-Seq	26793951
2	AAMP	skin	-0.77	2.47e-05	DOWN	RNA-Seq	28068941
2	ABCB6	prefrontal cortex	0.43	1.97e-05	UP	RNA-Seq	26793951
11	ABCC8	skin	1.14	0.000434	UP	RNA-Seq	28068941
4	ABCE1	prefrontal cortex	-0.28	0.000401	DOWN	RNA-Seq	26793951
6	ABT1	skin	-0.82	2.79e-05	DOWN	RNA-Seq	28068941
3	ABTB1	skin	-1.26	1.61e-08	DOWN	RNA-Seq	28068941
-	AC002472.13	prefrontal cortex	-0.81	0.000734	DOWN	RNA-Seq	26793951
-	AC026310.1	prefrontal cortex	-0.65	0.00281	DOWN	RNA-Seq	26793951
-	AC073343.1	prefrontal cortex	-0.69	1.08e-05	DOWN	RNA-Seq	26793951
-	AC135048.1	prefrontal cortex	0.73	0.000259	UP	RNA-Seq	26793951
-	AC139100.2	prefrontal cortex	0.57	0.000979	UP	RNA-Seq	26793951
-	AC145676.2	prefrontal cortex	0.7	0.00302	UP	RNA-Seq	26793951
3	ACAA1	skin	-0.96	1.48e-06	DOWN	RNA-Seq	28068941
10	ACADSB	prefrontal cortex	-0.39	7.81e-05	DOWN	RNA-Seq	26793951
17	ACADVL	prefrontal cortex	0.3	0.00145	UP	RNA-Seq	26793951
17	ACADVL	skin	-0.58	0.00225	DOWN	RNA-Seq	28068941
4	ACOX3	skin	-0.69	0.000506	DOWN	RNA-Seq	28068941
X	ACRC	prefrontal cortex	0.65	1.26e-05	UP	RNA-Seq	26793951
15	ACSBG1	skin	-1.09	1.2e-07	DOWN	RNA-Seq	28068941
20	ACSS1	skin	-0.58	0.00134	DOWN	RNA-Seq	28068941
10	ACTA2	prefrontal cortex	-0.71	0.00246	DOWN	RNA-Seq	26793951
15	ACTC1	skin	0.61	0.000217	UP	RNA-Seq	28068941
1	ACTN2	prefrontal cortex	-0.33	0.00292	DOWN	RNA-Seq	26793951
2	ACVR1C	skin	0.67	0.0013	UP	RNA-Seq	28068941
14	ACYP1	skin	-0.6	0.00229	DOWN	RNA-Seq	28068941
20	ADAM33	prefrontal cortex	0.84	4.39e-07	UP	RNA-Seq	26793951
8	ADAMDEC1	skin	1.86	2.22e-10	UP	RNA-Seq	28068941
11	ADAMTS15	skin	-0.69	0.0023	DOWN	RNA-Seq	28068941
5	ADAMTS2	prefrontal cortex	0.57	0.000467	UP	RNA-Seq	26793951
4	ADAMTS3	skin	0.75	0.000246	UP	RNA-Seq	28068941
21	ADAMTS5	prefrontal cortex	-0.76	0.000533	DOWN	RNA-Seq	26793951
10	ADARB2	peripheral blood	0.32	0.002	UP	RNA-seq	25475535
16	ADAT1	prefrontal cortex	-0.26	0.00307	DOWN	RNA-Seq	26793951
6	ADAT2	prefrontal cortex	-0.28	0.00239	DOWN	RNA-Seq	26793951
7	ADCK2	skin	-0.64	0.00198	DOWN	RNA-Seq	28068941
1	ADCK3	skin	-0.58	0.00107	DOWN	RNA-Seq	28068941
1	ADCY10	prefrontal cortex	0.55	0.00114	UP	RNA-Seq	26793951
8	ADCY8	skin	0.63	0.00167	UP	RNA-Seq	28068941
18	ADCYAP1	prefrontal cortex	-0.68	0.000455	DOWN	RNA-Seq	26793951
18	ADCYAP1	skin	0.88	0.000916	UP	RNA-Seq	28068941
6	ADGB	prefrontal cortex	-0.77	0.00122	DOWN	RNA-Seq	26793951
3	ADIPOQ	skin	0.99	2.13e-08	UP	RNA-Seq	28068941
11	ADM	prefrontal cortex	0.68	0.00207	UP	RNA-Seq	26793951
11	ADM	skin	-0.66	0.000566	DOWN	RNA-Seq	28068941
1	ADORA3	skin	-0.71	0.00116	DOWN	RNA-Seq	28068941
1	ADPRHL2	skin	-0.79	1.98e-05	DOWN	RNA-Seq	28068941
15	AEN	skin	-0.65	0.00139	DOWN	RNA-Seq	28068941
19	AES	skin	-0.64	0.000261	DOWN	RNA-Seq	28068941
7	AGAP3	skin	-0.62	0.000709	DOWN	RNA-Seq	28068941
7	AGFG2	prefrontal cortex	0.34	0.000404	UP	RNA-Seq	26793951
9	AGTPBP1	prefrontal cortex	-0.42	0.00165	DOWN	RNA-Seq	26793951
1	AGTRAP	skin	-0.95	7.97e-06	DOWN	RNA-Seq	28068941
14	AHSA1	prefrontal cortex	0.42	0.000225	UP	RNA-Seq	26793951
7	AIMP2	prefrontal cortex	-0.21	0.00276	DOWN	RNA-Seq	26793951
11	AIP	skin	-0.61	0.00196	DOWN	RNA-Seq	28068941
9	AK1	prefrontal cortex	0.29	0.000674	UP	RNA-Seq	26793951
14	AK7	prefrontal cortex	-0.69	0.00042	DOWN	RNA-Seq	26793951
6	AKAP12	skin	0.56	0.000983	UP	RNA-Seq	28068941
14	AKAP5	prefrontal cortex	-0.67	0.000886	DOWN	RNA-Seq	26793951
14	AKAP6	prefrontal cortex	-0.37	2.66e-05	DOWN	RNA-Seq	26793951
9	AKNA	blood	0.1	9.65e-05	UP	RNA-seq	28916538
10	AKR1C2	prefrontal cortex	0.72	5.88e-05	UP	RNA-Seq	26793951
10	AKR1C3	skin	-0.68	9.65e-05	DOWN	RNA-Seq	28068941
10	AKR1C3	skin	-0.68	9.65e-05	DOWN	RNA-Seq	28068941
-	AL031663.2	prefrontal cortex	0.63	0.00195	UP	RNA-Seq	26793951
-	AL035588.1	prefrontal cortex	0.69	0.0027	UP	RNA-Seq	26793951
-	AL138781.1	prefrontal cortex	0.84	4.94e-06	UP	RNA-Seq	26793951
-	AL807752.1	prefrontal cortex	-0.67	0.000442	DOWN	RNA-Seq	26793951
4	ALB	prefrontal cortex	-0.6	0.00187	DOWN	RNA-Seq	26793951
19	ALDH16A1	skin	-0.72	0.000286	DOWN	RNA-Seq	28068941
9	ALDH1A1	prefrontal cortex	-0.54	9.82e-05	DOWN	RNA-Seq	26793951
3	ALDH1L1	skin	-1.02	9.31e-05	DOWN	RNA-Seq	28068941
11	ALDH3B1	skin	-0.67	0.000802	DOWN	RNA-Seq	28068941
11	ALKBH8	prefrontal cortex	-0.32	0.000363	DOWN	RNA-Seq	26793951
2	ALMS1	prefrontal cortex	-0.47	0.000305	DOWN	RNA-Seq	26793951
2	ALMS1P	skin	1.65	0.000312	UP	RNA-Seq	28068941
17	ALOX15B	prefrontal cortex	0.61	0.00198	UP	RNA-Seq	26793951
3	ALS2CL	skin	-0.64	0.000724	DOWN	RNA-Seq	28068941
12	AMDHD1	prefrontal cortex	-0.57	0.00127	DOWN	RNA-Seq	26793951
1	AMY2A	prefrontal cortex	-0.68	0.00106	DOWN	RNA-Seq	26793951
2	ANAPC1	prefrontal cortex	-0.2	0.00264	DOWN	RNA-Seq	26793951
10	ANAPC16	prefrontal cortex	0.36	0.00049	UP	RNA-Seq	26793951
9	ANAPC2	blood	0.19	2.98e-08	UP	RNA-seq	28916538
8	ANGPT2	prefrontal cortex	0.73	0.000253	UP	RNA-Seq	26793951
9	ANGPTL2	prefrontal cortex	-0.71	0.000197	DOWN	RNA-Seq	26793951
10	ANK3	prefrontal cortex	-0.47	0.000155	DOWN	RNA-Seq	26793951
19	ANKLE1	prefrontal cortex	0.51	0.000283	UP	RNA-Seq	26793951
1	ANKRD13C	prefrontal cortex	-0.27	0.00307	DOWN	RNA-Seq	26793951
2	ANKRD20B	skin	1.06	0.00078	UP	RNA-Seq	28068941
5	ANKRD31	skin	0.7	0.000955	UP	RNA-Seq	28068941
5	ANKRD34B	prefrontal cortex	-0.83	0.000252	DOWN	RNA-Seq	26793951
1	ANKRD35	skin	-0.84	9.81e-06	DOWN	RNA-Seq	28068941
1	ANKRD35	skin	-0.84	9.81e-06	DOWN	RNA-Seq	28068941
2	ANKRD36	prefrontal cortex	-0.55	3.02e-05	DOWN	RNA-Seq	26793951
2	ANKRD36C	prefrontal cortex	-0.51	0.000238	DOWN	RNA-Seq	26793951
4	ANKRD37	prefrontal cortex	0.6	9.4e-05	UP	RNA-Seq	26793951
22	ANKRD54	skin	-0.59	0.0014	DOWN	RNA-Seq	28068941
6	ANKRD66	prefrontal cortex	-0.74	0.00177	DOWN	RNA-Seq	26793951
12	ANO2	prefrontal cortex	0.52	0.00174	UP	RNA-Seq	26793951
15	ANPEP	prefrontal cortex	0.72	9.97e-05	UP	RNA-Seq	26793951
17	AOC2	prefrontal cortex	0.44	0.00103	UP	RNA-Seq	26793951
19	AP2S1	skin	-0.86	8.79e-06	DOWN	RNA-Seq	28068941
7	AP4M1	skin	-0.68	0.00192	DOWN	RNA-Seq	28068941
20	APCDD1L	skin	0.71	0.00199	UP	RNA-Seq	28068941
19	APOC1	skin	-1.45	3.32e-11	DOWN	RNA-Seq	28068941
X	APOOL	prefrontal cortex	-0.56	0.0031	DOWN	RNA-Seq	26793951
16	APRT	skin	-0.68	0.000209	DOWN	RNA-Seq	28068941
11	ARAP1	prefrontal cortex	0.39	0.00199	UP	RNA-Seq	26793951
11	ARAP1	skin	-0.72	0.00024	DOWN	RNA-Seq	28068941
14	AREL1	prefrontal cortex	-0.2	0.000811	DOWN	RNA-Seq	26793951
7	ARF5	skin	-0.94	9.44e-07	DOWN	RNA-Seq	28068941
13	ARGLU1	skin	-0.52	0.00202	DOWN	RNA-Seq	28068941
20	ARHGAP40	skin	-0.64	0.000387	DOWN	RNA-Seq	28068941
1	ARHGEF10L	skin	-0.58	0.00076	DOWN	RNA-Seq	28068941
1	ARHGEF19	prefrontal cortex	0.64	3.7e-05	UP	RNA-Seq	26793951
4	ARHGEF38	skin	1.12	8.84e-06	UP	RNA-Seq	28068941
7	ARHGEF5	skin	-0.69	0.00013	DOWN	RNA-Seq	28068941
2	ARID5A	prefrontal cortex	0.52	0.00024	UP	RNA-Seq	26793951
3	ARIH2OS	prefrontal cortex	-0.4	0.00223	DOWN	RNA-Seq	26793951
-	ARL17A_dup1	skin	-0.99	0.00219	DOWN	RNA-Seq	28068941
12	ARL6IP4	prefrontal cortex	0.5	0.000286	UP	RNA-Seq	26793951
X	ARMCX3	blood	0.19	2.22e-05	UP	RNA-seq	28916538
X	ARMCX4	prefrontal cortex	-0.35	1.64e-05	DOWN	RNA-Seq	26793951
X	ARMCX5	prefrontal cortex	-0.28	0.000542	DOWN	RNA-Seq	26793951
7	ARPC1B	skin	-0.64	0.000219	DOWN	RNA-Seq	28068941
9	ARPC5L	skin	-0.61	0.0009	DOWN	RNA-Seq	28068941
X	ARR3	prefrontal cortex	-0.55	0.0031	DOWN	RNA-Seq	26793951
19	ARRDC2	skin	-0.88	1.09e-05	DOWN	RNA-Seq	28068941
5	ARSB	prefrontal cortex	-0.22	0.00302	DOWN	RNA-Seq	26793951
4	ART3	prefrontal cortex	0.48	0.0026	UP	RNA-Seq	26793951
11	ASCL2	skin	-1.44	6e-06	DOWN	RNA-Seq	28068941
2	ASPRV1	skin	-0.64	0.000174	DOWN	RNA-Seq	28068941
17	ASPSCR1	skin	-1	0.000439	DOWN	RNA-Seq	28068941
3	ASTE1	prefrontal cortex	-0.34	1.28e-05	DOWN	RNA-Seq	26793951
1	ATF3	skin	-0.52	0.00166	DOWN	RNA-Seq	28068941
22	ATF4	prefrontal cortex	0.33	0.00118	UP	RNA-Seq	26793951
1	ATF6	prefrontal cortex	-0.21	0.0016	DOWN	RNA-Seq	26793951
14	ATG14	prefrontal cortex	-0.33	2.29e-05	DOWN	RNA-Seq	26793951
11	ATG16L2	skin	-0.59	0.000997	DOWN	RNA-Seq	28068941
2	ATG4B	prefrontal cortex	0.35	0.000102	UP	RNA-Seq	26793951
19	ATG4D	skin	-0.64	0.000464	DOWN	RNA-Seq	28068941
2	ATOH8	prefrontal cortex	0.62	0.000372	UP	RNA-Seq	26793951
5	ATOX1	skin	-0.72	6.89e-05	DOWN	RNA-Seq	28068941
5	ATP10B	prefrontal cortex	-0.59	0.0019	DOWN	RNA-Seq	26793951
18	ATP5A1	blood	-0.07	0.00023	DOWN	RNA-seq	28916538
20	ATP5E	skin	-1.03	4.33e-09	DOWN	RNA-Seq	28068941
1	ATP5F1	blood	0.12	0.000133	UP	RNA-seq	28916538
12	ATP5G2	skin	-0.67	0.000124	DOWN	RNA-Seq	28068941
2	ATP5G3	skin	-0.78	6.79e-06	DOWN	RNA-Seq	28068941
4	ATP5I	skin	-1.12	3.74e-10	DOWN	RNA-Seq	28068941
7	ATP5J2	skin	-0.84	2.63e-06	DOWN	RNA-Seq	28068941
11	ATP5L	skin	-0.74	3.35e-05	DOWN	RNA-Seq	28068941
16	ATP6V0D1	blood	0.1	0.000146	UP	RNA-seq	28916538
13	ATP8A2	skin	0.98	0.000268	UP	RNA-Seq	28068941
1	ATPIF1	skin	-0.6	0.000919	DOWN	RNA-Seq	28068941
3	ATR	prefrontal cortex	-0.36	7.47e-06	DOWN	RNA-Seq	26793951
14	ATXN3	prefrontal cortex	-0.2	0.00177	DOWN	RNA-Seq	26793951
2	AUP1	prefrontal cortex	0.33	0.00206	UP	RNA-Seq	26793951
19	AURKC	prefrontal cortex	0.42	0.00212	UP	RNA-Seq	26793951
X	AWAT2	skin	-0.78	0.00101	DOWN	RNA-Seq	28068941
7	AZGP1	prefrontal cortex	0.74	0.00077	UP	RNA-Seq	26793951
15	B2M	skin	-0.78	3.58e-06	DOWN	RNA-Seq	28068941
21	B3GALT5	skin	0.76	0.000632	UP	RNA-Seq	28068941
19	B3GNT3	skin	-1.35	5.34e-09	DOWN	RNA-Seq	28068941
2	B3GNT7	skin	0.78	0.000998	UP	RNA-Seq	28068941
11	B4GALNT4	prefrontal cortex	0.43	8.08e-05	UP	RNA-Seq	26793951
6	BACH2	skin	0.69	0.000161	UP	RNA-Seq	28068941
10	BAG3	prefrontal cortex	1.03	6.13e-07	UP	RNA-Seq	26793951
6	BAK1	skin	-0.75	0.00081	DOWN	RNA-Seq	28068941
16	BANP	prefrontal cortex	0.39	3.7e-05	UP	RNA-Seq	26793951
1	BARHL2	prefrontal cortex	-0.65	0.00101	DOWN	RNA-Seq	26793951
5	BASP1	blood	0.15	3.07e-06	UP	RNA-seq	28916538
3	BBX	blood	0.11	0.000174	UP	RNA-seq	28916538
19	BCAT2	prefrontal cortex	0.39	0.00115	UP	RNA-Seq	26793951
19	BCAT2	skin	-1.15	8.52e-08	DOWN	RNA-Seq	28068941
19	BCL3	prefrontal cortex	0.57	0.000953	UP	RNA-Seq	26793951
3	BCL6	prefrontal cortex	0.47	0.0023	UP	RNA-Seq	26793951
11	BDNF	prefrontal cortex	-0.67	0.000375	DOWN	RNA-Seq	26793951
20	BLCAP	skin	-0.71	6.84e-05	DOWN	RNA-Seq	28068941
19	BLVRB	skin	-0.77	2.13e-05	DOWN	RNA-Seq	28068941
4	BMP2K	prefrontal cortex	-0.4	0.000466	DOWN	RNA-Seq	26793951
1	BNIPL	prefrontal cortex	0.68	8.25e-05	UP	RNA-Seq	26793951
4	BOD1L1	prefrontal cortex	-0.31	0.000321	DOWN	RNA-Seq	26793951
8	BOP1	skin	-0.94	0.000358	DOWN	RNA-Seq	28068941
8	BOP1	skin	-0.94	0.000358	DOWN	RNA-Seq	28068941
17	BPTF	blood	-0.12	0.000251	DOWN	RNA-seq	28916538
7	BRAF	prefrontal cortex	-0.49	0.000845	DOWN	RNA-Seq	26793951
7	BRI3	prefrontal cortex	0.26	0.00178	UP	RNA-Seq	26793951
11	BRMS1	skin	-0.68	0.000405	DOWN	RNA-Seq	28068941
10	BTAF1	prefrontal cortex	-0.4	0.00308	DOWN	RNA-Seq	26793951
6	BTN1A1	skin	0.99	0.000445	UP	RNA-Seq	28068941
10	C10orf107	prefrontal cortex	-0.58	0.00281	DOWN	RNA-Seq	26793951
10	C10orf111	prefrontal cortex	0.61	6.84e-05	UP	RNA-Seq	26793951
10	C10orf129	skin	-1.01	3.32e-05	DOWN	RNA-Seq	28068941
10	C10orf25	skin	0.76	0.000875	UP	RNA-Seq	28068941
10	C10orf35	skin	-0.77	0.000988	DOWN	RNA-Seq	28068941
10	C10orf68	prefrontal cortex	-0.51	0.00199	DOWN	RNA-Seq	26793951
10	C10orf79	skin	0.68	0.00172	UP	RNA-Seq	28068941
10	C10orf81	skin	0.94	0.000202	UP	RNA-Seq	28068941
10	C10orf85	prefrontal cortex	0.79	1.32e-05	UP	RNA-Seq	26793951
11	C11orf16	prefrontal cortex	-0.81	0.000736	DOWN	RNA-Seq	26793951
11	C11orf35	skin	-1.44	0.00025	DOWN	RNA-Seq	28068941
11	C11orf49	skin	-0.68	0.000138	DOWN	RNA-Seq	28068941
11	C11orf51	skin	-0.63	0.00197	DOWN	RNA-Seq	28068941
11	C11orf52	skin	-0.65	0.00195	DOWN	RNA-Seq	28068941
11	C11orf52	skin	-0.65	0.00195	DOWN	RNA-Seq	28068941
11	C11orf59	skin	-0.62	0.000704	DOWN	RNA-Seq	28068941
11	C11orf83	prefrontal cortex	0.33	0.000372	UP	RNA-Seq	26793951
11	C11orf84	prefrontal cortex	0.5	1.28e-05	UP	RNA-Seq	26793951
11	C11orf85	skin	1.88	0.00184	UP	RNA-Seq	28068941
11	C11orf92	skin	0.85	3.04e-05	UP	RNA-Seq	28068941
11	C11orf94	prefrontal cortex	0.77	0.000395	UP	RNA-Seq	26793951
11	C11orf96	skin	-0.82	0.000319	DOWN	RNA-Seq	28068941
12	C12orf39	skin	1.42	0.00198	UP	RNA-Seq	28068941
12	C12orf44	skin	-0.82	2.27e-05	DOWN	RNA-Seq	28068941
12	C12orf47	skin	-0.54	0.00185	DOWN	RNA-Seq	28068941
12	C12orf57	skin	-0.87	5.13e-06	DOWN	RNA-Seq	28068941
12	C12orf62	skin	-0.9	5.54e-07	DOWN	RNA-Seq	28068941
13	C13orf15	skin	-0.59	0.00118	DOWN	RNA-Seq	28068941
14	C14orf142	skin	-0.95	6.23e-05	DOWN	RNA-Seq	28068941
14	C14orf166	skin	-0.6	0.000794	DOWN	RNA-Seq	28068941
14	C14orf2	skin	-0.55	0.00207	DOWN	RNA-Seq	28068941
14	C14orf4	skin	-0.7	0.000145	DOWN	RNA-Seq	28068941
15	C15orf39	prefrontal cortex	0.42	0.000255	UP	RNA-Seq	26793951
15	C15orf48	skin	-1.3	4.44e-10	DOWN	RNA-Seq	28068941
15	C15orf61	skin	-0.8	1.63e-05	DOWN	RNA-Seq	28068941
16	C16orf48	skin	-0.89	9.46e-05	DOWN	RNA-Seq	28068941
16	C16orf7	skin	-0.8	0.00195	DOWN	RNA-Seq	28068941
16	C16orf91	skin	-0.84	3.23e-05	DOWN	RNA-Seq	28068941
17	C17orf106	skin	-0.85	0.000254	DOWN	RNA-Seq	28068941
17	C17orf107	skin	-0.71	0.00165	DOWN	RNA-Seq	28068941
17	C17orf56	skin	-0.63	0.00108	DOWN	RNA-Seq	28068941
17	C17orf59	skin	-0.84	7.39e-05	DOWN	RNA-Seq	28068941
17	C17orf67	prefrontal cortex	0.52	9.79e-05	UP	RNA-Seq	26793951
17	C17orf79	skin	-0.65	0.000924	DOWN	RNA-Seq	28068941
17	C17orf90	skin	-0.75	0.00134	DOWN	RNA-Seq	28068941
17	C17orf96	skin	-1.52	7.78e-09	DOWN	RNA-Seq	28068941
18	C18orf42	prefrontal cortex	-0.7	0.0028	DOWN	RNA-Seq	26793951
19	C19orf33	prefrontal cortex	0.76	0.00115	UP	RNA-Seq	26793951
19	C19orf33	skin	-1.27	1.84e-11	DOWN	RNA-Seq	28068941
19	C19orf48	prefrontal cortex	-0.42	0.000744	DOWN	RNA-Seq	26793951
19	C19orf53	skin	-0.62	0.000909	DOWN	RNA-Seq	28068941
19	C19orf56	skin	-0.82	2.3e-06	DOWN	RNA-Seq	28068941
19	C19orf62	skin	-0.58	0.00102	DOWN	RNA-Seq	28068941
19	C19orf70	skin	-1.01	1.84e-05	DOWN	RNA-Seq	28068941
1	C1orf143	prefrontal cortex	0.7	0.00276	UP	RNA-Seq	26793951
1	C1orf145	prefrontal cortex	-0.67	0.000859	DOWN	RNA-Seq	26793951
1	C1orf158	skin	-2.6	2.21e-18	DOWN	RNA-Seq	28068941
1	C1orf170	skin	-1.01	3.25e-06	DOWN	RNA-Seq	28068941
1	C1orf177	prefrontal cortex	-0.74	0.00206	DOWN	RNA-Seq	26793951
1	C1orf54	skin	-0.63	0.00181	DOWN	RNA-Seq	28068941
1	C1orf54	skin	-0.63	0.00181	DOWN	RNA-Seq	28068941
1	C1orf63	skin	-0.63	0.000385	DOWN	RNA-Seq	28068941
1	C1orf63	blood	-0.2	2.7e-05	DOWN	RNA-seq	28916538
1	C1QA	prefrontal cortex	0.65	0.00218	UP	RNA-Seq	26793951
1	C1QA	skin	-0.91	9.1e-06	DOWN	RNA-Seq	28068941
1	C1QA	skin	-0.91	9.1e-06	DOWN	RNA-Seq	28068941
4	C1QTNF7	prefrontal cortex	-0.8	0.00018	DOWN	RNA-Seq	26793951
20	C20orf195	prefrontal cortex	0.78	0.000582	UP	RNA-Seq	26793951
20	C20orf24	skin	-0.68	0.000131	DOWN	RNA-Seq	28068941
20	C20orf3	skin	-0.69	0.000836	DOWN	RNA-Seq	28068941
21	C21orf33	skin	-0.99	7.02e-08	DOWN	RNA-Seq	28068941
21	C21orf81	skin	1.42	2.96e-05	UP	RNA-Seq	28068941
22	C22orf34	prefrontal cortex	0.82	9.47e-07	UP	RNA-Seq	26793951
2	C2orf16	prefrontal cortex	-0.57	0.00013	DOWN	RNA-Seq	26793951
2	C2orf7	skin	-0.72	0.00156	DOWN	RNA-Seq	28068941
12	C3AR1	skin	-0.52	0.000849	DOWN	RNA-Seq	28068941
3	C3orf17	prefrontal cortex	-0.19	0.000222	DOWN	RNA-Seq	26793951
3	C3orf45	skin	-1.15	3.76e-06	DOWN	RNA-Seq	28068941
3	C3orf45	skin	-1.15	3.76e-06	DOWN	RNA-Seq	28068941
3	C3orf54	skin	-0.75	0.0012	DOWN	RNA-Seq	28068941
3	C3orf75	skin	-0.63	0.00112	DOWN	RNA-Seq	28068941
3	C3orf78	skin	-0.83	0.000166	DOWN	RNA-Seq	28068941
4	C4orf22	prefrontal cortex	-1.03	1.74e-05	DOWN	RNA-Seq	26793951
4	C4orf29	prefrontal cortex	-0.26	0.00204	DOWN	RNA-Seq	26793951
4	C4orf31	skin	0.78	4.55e-05	UP	RNA-Seq	28068941
4	C4orf33	prefrontal cortex	-0.29	0.00287	DOWN	RNA-Seq	26793951
4	C4orf50	prefrontal cortex	-0.79	0.000225	DOWN	RNA-Seq	26793951
9	C5	prefrontal cortex	-0.37	0.00212	DOWN	RNA-Seq	26793951
19	C5AR1	skin	-0.66	2.67e-05	DOWN	RNA-Seq	28068941
5	C5orf42	prefrontal cortex	-0.28	0.00189	DOWN	RNA-Seq	26793951
5	C5orf46	skin	-0.92	3.41e-07	DOWN	RNA-Seq	28068941
5	C5orf55	prefrontal cortex	-0.34	0.00254	DOWN	RNA-Seq	26793951
5	C5orf58	skin	-1.23	0.000828	DOWN	RNA-Seq	28068941
5	C6	skin	0.82	0.000326	UP	RNA-Seq	28068941
5	C6	skin	0.82	0.000326	UP	RNA-Seq	28068941
6	C6orf1	skin	-0.81	0.000196	DOWN	RNA-Seq	28068941
6	C6orf115	skin	-0.84	1.52e-05	DOWN	RNA-Seq	28068941
6	C6orf125	skin	-0.8	6.31e-05	DOWN	RNA-Seq	28068941
6	C6orf141	prefrontal cortex	-0.89	0.000156	DOWN	RNA-Seq	26793951
6	C6orf226	skin	-0.87	0.00156	DOWN	RNA-Seq	28068941
6	C6orf48	skin	-0.7	0.000199	DOWN	RNA-Seq	28068941
6	C6orf48	skin	-0.7	0.000199	DOWN	RNA-Seq	28068941
6	C6orf48	skin	-0.7	0.000199	DOWN	RNA-Seq	28068941
6	C6orf48	skin	-0.7	0.000199	DOWN	RNA-Seq	28068941
6	C6orf48	skin	-0.7	0.000199	DOWN	RNA-Seq	28068941
6	C6orf81	skin	-1.13	0.000771	DOWN	RNA-Seq	28068941
7	C7orf29	skin	-0.81	0.00216	DOWN	RNA-Seq	28068941
7	C7orf47	skin	-0.96	1.39e-05	DOWN	RNA-Seq	28068941
7	C7orf55	skin	-0.92	1.24e-06	DOWN	RNA-Seq	28068941
7	C7orf55-LUC7L2	prefrontal cortex	-0.29	0.000318	DOWN	RNA-Seq	26793951
7	C7orf57	prefrontal cortex	-0.76	0.00124	DOWN	RNA-Seq	26793951
7	C7orf59	skin	-1.09	1.79e-09	DOWN	RNA-Seq	28068941
7	C7orf61	prefrontal cortex	1.07	5.03e-07	UP	RNA-Seq	26793951
8	C8orf40	skin	-0.77	3.59e-05	DOWN	RNA-Seq	28068941
8	C8orf44	prefrontal cortex	-0.29	0.000641	DOWN	RNA-Seq	26793951
9	C9orf114	prefrontal cortex	0.36	0.00059	UP	RNA-Seq	26793951
9	C9orf119	skin	-0.89	2.02e-05	DOWN	RNA-Seq	28068941
9	C9orf142	skin	-0.69	0.00217	DOWN	RNA-Seq	28068941
9	C9orf152	prefrontal cortex	0.93	0.000102	UP	RNA-Seq	26793951
9	C9orf16	skin	-1.23	8.31e-06	DOWN	RNA-Seq	28068941
9	C9orf169	skin	-1.28	5.35e-07	DOWN	RNA-Seq	28068941
9	C9orf171	prefrontal cortex	-0.69	0.00206	DOWN	RNA-Seq	26793951
9	C9orf23	skin	-0.65	0.00214	DOWN	RNA-Seq	28068941
8	CA8	skin	0.96	1.67e-05	UP	RNA-Seq	28068941
16	CACNA1H	skin	-1.07	1.32e-07	DOWN	RNA-Seq	28068941
10	CACUL1	prefrontal cortex	-0.25	2.6e-05	DOWN	RNA-Seq	26793951
12	CALCOCO1	blood	0.11	7.25e-05	UP	RNA-seq	28916538
10	CALML3	skin	-1.07	1.21e-07	DOWN	RNA-Seq	28068941
10	CALML5	skin	-0.77	4.47e-05	DOWN	RNA-Seq	28068941
1	CALML6	skin	-2.79	3.52e-06	DOWN	RNA-Seq	28068941
7	CALN1	prefrontal cortex	-0.48	0.00254	DOWN	RNA-Seq	26793951
2	CAPG	skin	-0.61	0.000876	DOWN	RNA-Seq	28068941
2	CAPN10	skin	-1.01	1.8e-05	DOWN	RNA-Seq	28068941
2	CAPN13	skin	-1.01	0.00207	DOWN	RNA-Seq	28068941
1	CAPN2	prefrontal cortex	0.32	0.000594	UP	RNA-Seq	26793951
X	CAPN6	skin	0.69	0.000506	UP	RNA-Seq	28068941
12	CAPS2	skin	0.85	0.00127	UP	RNA-Seq	28068941
17	CARD14	prefrontal cortex	0.6	0.000181	UP	RNA-Seq	26793951
11	CARD18	skin	-1.05	3.71e-06	DOWN	RNA-Seq	28068941
9	CARD9	prefrontal cortex	0.69	1.08e-07	UP	RNA-Seq	26793951
2	CARF	prefrontal cortex	-0.5	0.000369	DOWN	RNA-Seq	26793951
10	CASC10	prefrontal cortex	0.49	8.87e-05	UP	RNA-Seq	26793951
11	CASP4	prefrontal cortex	0.54	0.00258	UP	RNA-Seq	26793951
10	CASP7	prefrontal cortex	0.61	5.94e-05	UP	RNA-Seq	26793951
16	CBLN1	prefrontal cortex	-0.84	0.000404	DOWN	RNA-Seq	26793951
14	CBLN3	prefrontal cortex	-0.84	0.000442	DOWN	RNA-Seq	26793951
21	CBR3	skin	-0.56	0.00169	DOWN	RNA-Seq	28068941
17	CBX2	prefrontal cortex	0.47	0.0015	UP	RNA-Seq	26793951
16	CCDC102A	prefrontal cortex	0.75	4.02e-06	UP	RNA-Seq	26793951
16	CCDC113	prefrontal cortex	-0.4	0.000897	DOWN	RNA-Seq	26793951
22	CCDC117	prefrontal cortex	0.42	6.49e-05	UP	RNA-Seq	26793951
7	CCDC129	skin	0.73	0.000164	UP	RNA-Seq	28068941
17	CCDC144A	prefrontal cortex	-0.83	0.000401	DOWN	RNA-Seq	26793951
17	CCDC144B	skin	0.98	2.3e-07	UP	RNA-Seq	28068941
19	CCDC151	prefrontal cortex	0.64	6.7e-06	UP	RNA-Seq	26793951
X	CCDC22	skin	-0.68	0.000853	DOWN	RNA-Seq	28068941
6	CCDC28A	skin	-0.65	0.000253	DOWN	RNA-Seq	28068941
1	CCDC30	skin	0.69	0.00122	UP	RNA-Seq	28068941
3	CCDC36	prefrontal cortex	0.58	0.00261	UP	RNA-Seq	26793951
12	CCDC42B	prefrontal cortex	-0.65	0.00175	DOWN	RNA-Seq	26793951
17	CCDC43	prefrontal cortex	-0.24	0.00184	DOWN	RNA-Seq	26793951
3	CCDC51	skin	-0.83	3.2e-05	DOWN	RNA-Seq	28068941
17	CCDC56	skin	-0.75	9.42e-05	DOWN	RNA-Seq	28068941
16	CCDC64B	skin	-0.69	0.00222	DOWN	RNA-Seq	28068941
3	CCDC80	skin	0.65	2.19e-05	UP	RNA-Seq	28068941
2	CCDC88A	prefrontal cortex	-0.38	0.00179	DOWN	RNA-Seq	26793951
4	CCDC96	skin	-1.08	0.000158	DOWN	RNA-Seq	28068941
6	CCHCR1	prefrontal cortex	0.31	0.000646	UP	RNA-Seq	26793951
17	CCL15	skin	-1.76	0.000209	DOWN	RNA-Seq	28068941
16	CCL17	prefrontal cortex	0.8	0.000277	UP	RNA-Seq	26793951
17	CCL23	skin	-0.94	0.00158	DOWN	RNA-Seq	28068941
9	CCL27	skin	-0.77	8.6e-05	DOWN	RNA-Seq	28068941
17	CCL5	skin	0.84	3.53e-05	UP	RNA-Seq	28068941
6	CCND3	prefrontal cortex	0.27	0.000352	UP	RNA-Seq	26793951
6	CCND3	skin	-0.62	0.000729	DOWN	RNA-Seq	28068941
16	CCNF	skin	-0.66	0.00146	DOWN	RNA-Seq	28068941
5	CCNH	prefrontal cortex	-0.26	0.00285	DOWN	RNA-Seq	26793951
5	CCNO	skin	-1.23	0.000143	DOWN	RNA-Seq	28068941
10	CCSER2	prefrontal cortex	-0.23	0.000692	DOWN	RNA-Seq	26793951
5	CCT5	blood	-0.09	0.00016	DOWN	RNA-seq	28916538
17	CCT6B	prefrontal cortex	-0.52	0.00273	DOWN	RNA-Seq	26793951
11	CD151	skin	-0.77	1.05e-05	DOWN	RNA-Seq	28068941
12	CD163	skin	-0.8	3.39e-06	DOWN	RNA-Seq	28068941
19	CD177	prefrontal cortex	0.98	3.68e-05	UP	RNA-Seq	26793951
5	CD180	skin	-0.65	0.000441	DOWN	RNA-Seq	28068941
19	CD33	skin	-0.59	0.00157	DOWN	RNA-Seq	28068941
7	CD36	prefrontal cortex	-0.86	0.00013	DOWN	RNA-Seq	26793951
4	CD38	prefrontal cortex	-0.62	0.00215	DOWN	RNA-Seq	26793951
11	CD3E	skin	0.64	0.000542	UP	RNA-Seq	28068941
11	CD3E	skin	0.64	0.000542	UP	RNA-Seq	28068941
11	CD3G	skin	0.6	0.0015	UP	RNA-Seq	28068941
11	CD3G	skin	0.6	0.0015	UP	RNA-Seq	28068941
12	CD4	prefrontal cortex	0.52	0.00026	UP	RNA-Seq	26793951
20	CD40	skin	-0.61	0.00193	DOWN	RNA-Seq	28068941
20	CD40	skin	-0.61	0.00193	DOWN	RNA-Seq	28068941
3	CD47	prefrontal cortex	-0.22	0.00274	DOWN	RNA-Seq	26793951
5	CD74	blood	0.2	3.73e-05	UP	RNA-seq	28916538
12	CD9	skin	-0.61	0.0005	DOWN	RNA-Seq	28068941
19	CDC34	skin	-0.8	0.000361	DOWN	RNA-Seq	28068941
11	CDC42BPG	prefrontal cortex	-0.74	0.00146	DOWN	RNA-Seq	26793951
12	CDCA3	skin	-0.74	0.00167	DOWN	RNA-Seq	28068941
16	CDH15	prefrontal cortex	-0.77	0.000213	DOWN	RNA-Seq	26793951
20	CDH22	skin	-1.18	1.28e-06	DOWN	RNA-Seq	28068941
16	CDK10	prefrontal cortex	0.35	0.000652	UP	RNA-Seq	26793951
16	CDK10	skin	-0.68	0.00132	DOWN	RNA-Seq	28068941
11	CDK2AP2	prefrontal cortex	0.4	0.00147	UP	RNA-Seq	26793951
17	CDK5RAP3	skin	-0.62	0.000465	DOWN	RNA-Seq	28068941
X	CDKL5	prefrontal cortex	-1.15	2.26e-07	DOWN	RNA-Seq	26793951
11	CDKN1C	skin	-0.61	0.000513	DOWN	RNA-Seq	28068941
5	CDO1	skin	0.75	0.000117	UP	RNA-Seq	28068941
X	CDR1	skin	0.59	0.0011	UP	RNA-Seq	28068941
17	CDRT1	skin	1.15	3.55e-05	UP	RNA-Seq	28068941
19	CEACAM3	skin	-2.73	7.32e-05	DOWN	RNA-Seq	28068941
19	CEACAM6	peripheral blood	0.48	0.0004	UP	RNA-seq	25475535
19	CEACAM6	skin	0.65	0.00192	UP	RNA-Seq	28068941
19	CEBPA	skin	-0.71	4.46e-05	DOWN	RNA-Seq	28068941
20	CEBPB	prefrontal cortex	0.52	0.000703	UP	RNA-Seq	26793951
20	CEBPB	skin	-0.74	8.66e-05	DOWN	RNA-Seq	28068941
8	CEBPD	prefrontal cortex	0.58	0.0031	UP	RNA-Seq	26793951
19	CEBPG	prefrontal cortex	0.33	0.000468	UP	RNA-Seq	26793951
22	CECR5	skin	-0.58	0.00157	DOWN	RNA-Seq	28068941
9	CEL	prefrontal cortex	0.57	0.00248	UP	RNA-Seq	26793951
22	CELSR1	prefrontal cortex	0.84	2.44e-05	UP	RNA-Seq	26793951
1	CENPL	prefrontal cortex	-0.25	0.00261	DOWN	RNA-Seq	26793951
12	CEP83	prefrontal cortex	-0.42	2.47e-05	DOWN	RNA-Seq	26793951
19	CERS1	prefrontal cortex	0.45	9.57e-05	UP	RNA-Seq	26793951
16	CES2	prefrontal cortex	-0.31	0.000225	DOWN	RNA-Seq	26793951
16	CES4A	skin	-0.57	0.00152	DOWN	RNA-Seq	28068941
19	CFD	prefrontal cortex	0.55	0.00058	UP	RNA-Seq	26793951
19	CFD	skin	-0.65	8.92e-05	DOWN	RNA-Seq	28068941
19	CFD	skin	-0.65	8.92e-05	DOWN	RNA-Seq	28068941
7	CFTR	prefrontal cortex	-0.75	0.00089	DOWN	RNA-Seq	26793951
10	CHCHD1	skin	-0.69	0.000203	DOWN	RNA-Seq	28068941
7	CHCHD2	skin	-0.58	0.0018	DOWN	RNA-Seq	28068941
2	CHCHD5	skin	-0.85	0.00022	DOWN	RNA-Seq	28068941
11	CHCHD8	skin	-0.73	0.000102	DOWN	RNA-Seq	28068941
20	CHD6	prefrontal cortex	-0.25	0.00148	DOWN	RNA-Seq	26793951
4	CHIC2	prefrontal cortex	0.29	0.0026	UP	RNA-Seq	26793951
14	CHMP4A	prefrontal cortex	0.33	0.00178	UP	RNA-Seq	26793951
11	CHORDC1	prefrontal cortex	0.57	0.000156	UP	RNA-Seq	26793951
15	CHRNA3	skin	1.11	7.72e-05	UP	RNA-Seq	28068941
16	CHTF18	skin	-1.17	4.76e-05	DOWN	RNA-Seq	28068941
15	CIB1	skin	-0.82	3.34e-05	DOWN	RNA-Seq	28068941
18	CIDEA	skin	-0.92	0.000204	DOWN	RNA-Seq	28068941
19	CIRBP	prefrontal cortex	-0.49	0.000471	DOWN	RNA-Seq	26793951
1	CITED4	skin	-1.03	1.4e-05	DOWN	RNA-Seq	28068941
14	CKB	skin	-0.74	3.67e-05	DOWN	RNA-Seq	28068941
16	CKLF	skin	-0.7	0.000327	DOWN	RNA-Seq	28068941
9	CKS2	prefrontal cortex	0.61	0.000208	UP	RNA-Seq	26793951
9	CKS2	skin	-1.03	1.22e-05	DOWN	RNA-Seq	28068941
3	CLASP2	prefrontal cortex	-0.32	0.00159	DOWN	RNA-Seq	26793951
7	CLDN15	prefrontal cortex	0.54	0.00256	UP	RNA-Seq	26793951
7	CLDN3	prefrontal cortex	-0.72	0.00243	DOWN	RNA-Seq	26793951
7	CLDN4	skin	-0.9	1.52e-06	DOWN	RNA-Seq	28068941
7	CLDN4	skin	-0.9	1.52e-06	DOWN	RNA-Seq	28068941
22	CLDN5	skin	-0.71	0.000249	DOWN	RNA-Seq	28068941
17	CLDN7	prefrontal cortex	0.71	0.000659	UP	RNA-Seq	26793951
16	CLEC18A	prefrontal cortex	0.55	0.00291	UP	RNA-Seq	26793951
16	CLEC18B	prefrontal cortex	0.64	9.44e-05	UP	RNA-Seq	26793951
12	CLEC2B	prefrontal cortex	0.64	0.00124	UP	RNA-Seq	26793951
12	CLEC4E	skin	-1.59	1.92e-09	DOWN	RNA-Seq	28068941
2	CLEC4F	prefrontal cortex	-0.71	0.0026	DOWN	RNA-Seq	26793951
X	CLIC2	prefrontal cortex	0.49	0.000625	UP	RNA-Seq	26793951
9	CLIC3	skin	-1.36	5.54e-07	DOWN	RNA-Seq	28068941
19	CLPP	skin	-0.66	0.00158	DOWN	RNA-Seq	28068941
5	CLTB	skin	-0.76	2.97e-05	DOWN	RNA-Seq	28068941
8	CLU	prefrontal cortex	0.43	0.000293	UP	RNA-Seq	26793951
1	CMPK1	blood	0.21	0.000159	UP	RNA-seq	28916538
1	CNIH4	skin	-0.74	0.000223	DOWN	RNA-Seq	28068941
7	CNPY1	skin	-1.75	0.00166	DOWN	RNA-Seq	28068941
19	CNTD2	prefrontal cortex	0.67	0.000829	UP	RNA-Seq	26793951
7	CNTNAP2	peripheral blood	-0.62	0.004	DOWN	RNA-seq	25475535
9	CNTNAP3	skin	0.92	2.39e-06	UP	RNA-Seq	28068941
2	CNTNAP5	prefrontal cortex	-0.69	0.000966	DOWN	RNA-Seq	26793951
7	COA1	prefrontal cortex	-0.23	0.000407	DOWN	RNA-Seq	26793951
17	COASY	skin	-0.61	0.00138	DOWN	RNA-Seq	28068941
14	COCH	prefrontal cortex	-0.86	0.000251	DOWN	RNA-Seq	26793951
10	COL13A1	prefrontal cortex	-0.71	0.00255	DOWN	RNA-Seq	26793951
8	COL14A1	skin	0.86	1.71e-06	UP	RNA-Seq	28068941
21	COL18A1	skin	-0.59	0.00126	DOWN	RNA-Seq	28068941
6	COL19A1	peripheral blood	-0.62	0.003	DOWN	RNA-seq	25475535
6	COL19A1	prefrontal cortex	-0.63	0.00228	DOWN	RNA-Seq	26793951
17	COL1A1	skin	0.7	3.77e-06	UP	RNA-Seq	28068941
17	COL1A1	skin	0.7	3.77e-06	UP	RNA-Seq	28068941
7	COL1A2	skin	0.57	0.000303	UP	RNA-Seq	28068941
7	COL1A2	skin	0.57	0.000303	UP	RNA-Seq	28068941
1	COL24A1	skin	0.92	1.91e-06	UP	RNA-Seq	28068941
2	COL3A1	skin	0.6	7.11e-05	UP	RNA-Seq	28068941
2	COL3A1	skin	0.6	7.11e-05	UP	RNA-Seq	28068941
19	COL5A3	skin	-0.58	0.00222	DOWN	RNA-Seq	28068941
3	COL6A5	skin	0.67	2.84e-06	UP	RNA-Seq	28068941
3	COL6A6	skin	0.99	1.45e-07	UP	RNA-Seq	28068941
20	COL9A3	skin	-0.71	0.000253	DOWN	RNA-Seq	28068941
19	COLGALT1	prefrontal cortex	0.36	0.000742	UP	RNA-Seq	26793951
10	COMMD3	skin	-0.63	0.000261	DOWN	RNA-Seq	28068941
8	COMMD5	skin	-0.63	0.0017	DOWN	RNA-Seq	28068941
4	COMMD8	skin	-0.72	0.000126	DOWN	RNA-Seq	28068941
19	COMP	skin	-1.41	5.45e-14	DOWN	RNA-Seq	28068941
10	COMTD1	skin	-1.23	1.7e-07	DOWN	RNA-Seq	28068941
7	COPG2	prefrontal cortex	-0.21	0.00196	DOWN	RNA-Seq	26793951
9	COQ4	skin	-0.67	0.000169	DOWN	RNA-Seq	28068941
17	CORO6	skin	-0.79	0.000275	DOWN	RNA-Seq	28068941
17	COX11	prefrontal cortex	-0.18	0.00114	DOWN	RNA-Seq	26793951
10	COX15	prefrontal cortex	-0.23	0.000231	DOWN	RNA-Seq	26793951
4	COX18	prefrontal cortex	-0.21	0.000845	DOWN	RNA-Seq	26793951
16	COX4I1	blood	-0.09	7.3e-05	DOWN	RNA-seq	28916538
2	COX5B	skin	-0.8	5.09e-06	DOWN	RNA-Seq	28068941
12	COX6A1	skin	-0.61	0.00107	DOWN	RNA-Seq	28068941
8	COX6C	skin	-0.77	1.93e-06	DOWN	RNA-Seq	28068941
19	COX7A1	skin	-0.93	2.71e-06	DOWN	RNA-Seq	28068941
6	COX7A2	skin	-0.98	2.11e-08	DOWN	RNA-Seq	28068941
2	COX7A2L	skin	-0.56	0.00206	DOWN	RNA-Seq	28068941
X	COX7B	skin	-1.02	9.08e-09	DOWN	RNA-Seq	28068941
1	CPSF3L	skin	-0.71	0.000104	DOWN	RNA-Seq	28068941
22	CPT1B	prefrontal cortex	0.47	0.000757	UP	RNA-Seq	26793951
1	CPT2	blood	0.2	7.32e-06	UP	RNA-seq	28916538
15	CRABP1	prefrontal cortex	0.66	0.00291	UP	RNA-Seq	26793951
1	CRCT1	skin	-1.39	1.6e-14	DOWN	RNA-Seq	28068941
7	CREB5	skin	0.64	0.000686	UP	RNA-Seq	28068941
3	CRELD1	prefrontal cortex	0.33	0.000433	UP	RNA-Seq	26793951
14	CRIP2	skin	-0.77	5.3e-05	DOWN	RNA-Seq	28068941
19	CRLF1	skin	-0.77	0.00119	DOWN	RNA-Seq	28068941
16	CRNDE	skin	-0.61	0.00127	DOWN	RNA-Seq	28068941
1	CROCC	skin	-1.02	6e-07	DOWN	RNA-Seq	28068941
1	CROCCP2	skin	-0.6	0.000779	DOWN	RNA-Seq	28068941
11	CRTAM	prefrontal cortex	-0.98	3.13e-05	DOWN	RNA-Seq	26793951
21	CRYZL1	prefrontal cortex	-0.17	0.00285	DOWN	RNA-Seq	26793951
X	CSAG1	prefrontal cortex	0.71	0.00011	UP	RNA-Seq	26793951
1	CSF1	prefrontal cortex	0.66	8.11e-05	UP	RNA-Seq	26793951
1	CSF3R	skin	-0.97	1.99e-07	DOWN	RNA-Seq	28068941
1	CSF3R	skin	-0.97	1.99e-07	DOWN	RNA-Seq	28068941
4	CSN1S1	skin	-2.47	2.36e-07	DOWN	RNA-Seq	28068941
6	CSNK2B	skin	-0.56	0.0014	DOWN	RNA-Seq	28068941
6	CSNK2B	skin	-0.56	0.0014	DOWN	RNA-Seq	28068941
6	CSNK2B	skin	-0.56	0.0014	DOWN	RNA-Seq	28068941
6	CSNK2B	skin	-0.56	0.0014	DOWN	RNA-Seq	28068941
6	CSNK2B	skin	-0.56	0.0014	DOWN	RNA-Seq	28068941
6	CSNK2B	skin	-0.56	0.0014	DOWN	RNA-Seq	28068941
6	CSNK2B	skin	-0.56	0.0014	DOWN	RNA-Seq	28068941
11	CST6	skin	-1.59	2.15e-17	DOWN	RNA-Seq	28068941
21	CSTB	skin	-0.74	8.94e-05	DOWN	RNA-Seq	28068941
-	CTA-299D3.8	prefrontal cortex	0.86	0.000276	UP	RNA-Seq	26793951
4	CTBP1	skin	-0.67	0.000179	DOWN	RNA-Seq	28068941
-	CTD-2260A17.2	prefrontal cortex	-0.36	0.000177	DOWN	RNA-Seq	26793951
1	CTNNBIP1	skin	-0.84	3.18e-06	DOWN	RNA-Seq	28068941
11	CTSD	skin	-0.59	0.001	DOWN	RNA-Seq	28068941
11	CTSF	skin	-0.65	0.000271	DOWN	RNA-Seq	28068941
9	CTSL1	skin	-0.54	0.00175	DOWN	RNA-Seq	28068941
4	CTSO	blood	0.15	8.13e-05	UP	RNA-seq	28916538
7	CTTNBP2	prefrontal cortex	-0.34	0.00179	DOWN	RNA-Seq	26793951
16	CTU2	skin	-1.29	0.00028	DOWN	RNA-Seq	28068941
10	CUBN	skin	0.57	0.00197	UP	RNA-Seq	28068941
6	CUTA	skin	-0.79	7.18e-06	DOWN	RNA-Seq	28068941
6	CUTA	skin	-0.79	7.18e-06	DOWN	RNA-Seq	28068941
10	CUZD1	prefrontal cortex	0.37	0.00276	UP	RNA-Seq	26793951
19	CXCL17	skin	1.24	0.00044	UP	RNA-Seq	28068941
4	CXCL6	prefrontal cortex	0.85	0.000389	UP	RNA-Seq	26793951
4	CXCL9	skin	1.59	4.11e-16	UP	RNA-Seq	28068941
2	CXCR4	prefrontal cortex	0.83	2.36e-05	UP	RNA-Seq	26793951
X	CXorf28	prefrontal cortex	0.64	0.00192	UP	RNA-Seq	26793951
X	CXorf56	prefrontal cortex	-0.25	0.00256	DOWN	RNA-Seq	26793951
X	CXorf67	prefrontal cortex	0.66	0.000458	UP	RNA-Seq	26793951
3	CYB561D2	prefrontal cortex	-0.39	0.000807	DOWN	RNA-Seq	26793951
3	CYB561D2	skin	-0.89	3.44e-05	DOWN	RNA-Seq	28068941
18	CYB5A	skin	-0.73	0.00014	DOWN	RNA-Seq	28068941
1	CYB5R1	skin	-0.66	0.00063	DOWN	RNA-Seq	28068941
16	CYBA	prefrontal cortex	0.52	0.00152	UP	RNA-Seq	26793951
8	CYC1	skin	-0.78	4.67e-06	DOWN	RNA-Seq	28068941
8	CYHR1	prefrontal cortex	0.27	0.00263	UP	RNA-Seq	26793951
8	CYHR1	skin	-0.82	3.11e-05	DOWN	RNA-Seq	28068941
10	CYP17A1	prefrontal cortex	-0.46	0.000516	DOWN	RNA-Seq	26793951
19	CYP4F2	skin	-1.85	1.71e-15	DOWN	RNA-Seq	28068941
19	CYP4F8	skin	-1.17	1.68e-06	DOWN	RNA-Seq	28068941
22	CYTH4	skin	-0.72	0.000171	DOWN	RNA-Seq	28068941
12	DAO	prefrontal cortex	-1.05	1.11e-05	DOWN	RNA-Seq	26793951
2	DAPL1	skin	-1.08	2.76e-09	DOWN	RNA-Seq	28068941
6	DAXX	prefrontal cortex	0.22	0.00298	UP	RNA-Seq	26793951
19	DAZAP1	skin	-0.72	8.43e-05	DOWN	RNA-Seq	28068941
1	DBT	prefrontal cortex	-0.36	0.000807	DOWN	RNA-Seq	26793951
4	DCAF16	prefrontal cortex	-0.51	1.47e-05	DOWN	RNA-Seq	26793951
4	DCAF4L1	prefrontal cortex	0.45	0.00249	UP	RNA-Seq	26793951
18	DCC	prefrontal cortex	-0.69	0.000795	DOWN	RNA-Seq	26793951
12	DCD	skin	-0.43	0.00214	DOWN	RNA-Seq	28068941
5	DCTN4	prefrontal cortex	-0.15	0.000796	DOWN	RNA-Seq	26793951
14	DDHD1	prefrontal cortex	-0.29	0.000825	DOWN	RNA-Seq	26793951
8	DDHD2	prefrontal cortex	-0.28	0.000811	DOWN	RNA-Seq	26793951
10	DDIT4	prefrontal cortex	1.01	1.6e-08	UP	RNA-Seq	26793951
10	DDIT4	skin	-0.99	3.4e-07	DOWN	RNA-Seq	28068941
4	DDIT4L	prefrontal cortex	0.67	0.000282	UP	RNA-Seq	26793951
22	DDT	skin	-0.67	0.000188	DOWN	RNA-Seq	28068941
16	DDX19A	prefrontal cortex	-0.18	0.0026	DOWN	RNA-Seq	26793951
20	DDX27	prefrontal cortex	0.2	0.00126	UP	RNA-Seq	26793951
5	DDX41	blood	0.11	6.44e-05	UP	RNA-seq	28916538
1	DEDD	prefrontal cortex	0.13	0.00204	UP	RNA-Seq	26793951
19	DEDD2	prefrontal cortex	0.46	0.000131	UP	RNA-Seq	26793951
8	DEFA4	peripheral blood	0.3	0.01	UP	RNA-seq	25475535
8	DEFA6	skin	-1.65	0.00119	DOWN	RNA-Seq	28068941
8	DEFB1	skin	-1.33	2.88e-12	DOWN	RNA-Seq	28068941
14	DEGS2	skin	-0.8	0.00022	DOWN	RNA-Seq	28068941
11	DGAT2	skin	-0.8	3.93e-05	DOWN	RNA-Seq	28068941
22	DGCR2	skin	-0.65	0.000276	DOWN	RNA-Seq	28068941
22	DGCR5	skin	0.75	0.00107	UP	RNA-Seq	28068941
22	DGCR6L	skin	-2.94	1.32e-05	DOWN	RNA-Seq	28068941
7	DGKI	prefrontal cortex	-0.55	5.31e-05	DOWN	RNA-Seq	26793951
3	DHFRL1	prefrontal cortex	-0.48	0.000126	DOWN	RNA-Seq	26793951
1	DHRS3	prefrontal cortex	0.42	0.00136	UP	RNA-Seq	26793951
2	DHX57	prefrontal cortex	-0.24	0.0004	DOWN	RNA-Seq	26793951
1	DIEXF	prefrontal cortex	-0.18	0.00254	DOWN	RNA-Seq	26793951
14	DIO3	prefrontal cortex	0.58	0.00268	UP	RNA-Seq	26793951
10	DKK1	skin	-1.06	5.63e-08	DOWN	RNA-Seq	28068941
14	DLK1	skin	-1.53	8.69e-05	DOWN	RNA-Seq	28068941
15	DLL4	prefrontal cortex	0.56	0.000831	UP	RNA-Seq	26793951
1	DMAP1	skin	-0.65	0.000444	DOWN	RNA-Seq	28068941
19	DMKN	skin	-0.79	9.51e-06	DOWN	RNA-Seq	28068941
19	DMPK	prefrontal cortex	0.32	0.00267	UP	RNA-Seq	26793951
X	DMRTC1B	prefrontal cortex	0.63	0.0012	UP	RNA-Seq	26793951
5	DNAH5	skin	0.98	1.79e-05	UP	RNA-Seq	28068941
2	DNAH6	skin	0.73	0.000388	UP	RNA-Seq	28068941
19	DNAJB1	prefrontal cortex	1.21	5.54e-09	UP	RNA-Seq	26793951
2	DNAJB2	skin	-0.64	0.00109	DOWN	RNA-Seq	28068941
22	DNAJB7	prefrontal cortex	-0.75	0.000131	DOWN	RNA-Seq	26793951
2	DNAJC10	prefrontal cortex	-0.35	0.000408	DOWN	RNA-Seq	26793951
5	DNAJC18	prefrontal cortex	-0.19	0.00118	DOWN	RNA-Seq	26793951
12	DNAJC22	prefrontal cortex	-0.63	0.00216	DOWN	RNA-Seq	26793951
20	DNAJC5	skin	-0.61	0.00145	DOWN	RNA-Seq	28068941
1	DNAJC6	prefrontal cortex	-0.35	0.0029	DOWN	RNA-Seq	26793951
22	DNAL4	skin	-0.76	0.00212	DOWN	RNA-Seq	28068941
16	DNASE1L2	prefrontal cortex	0.59	0.000162	UP	RNA-Seq	26793951
16	DNASE1L2	skin	-1.37	1.87e-07	DOWN	RNA-Seq	28068941
3	DNASE1L3	prefrontal cortex	0.78	0.000685	UP	RNA-Seq	26793951
19	DOCK6	prefrontal cortex	0.56	6.09e-05	UP	RNA-Seq	26793951
2	DOK1	prefrontal cortex	0.36	0.00215	UP	RNA-Seq	26793951
2	DOK1	skin	-0.91	1.75e-05	DOWN	RNA-Seq	28068941
8	DOK2	skin	-0.85	0.000481	DOWN	RNA-Seq	28068941
6	DOPEY1	prefrontal cortex	-0.42	1.2e-05	DOWN	RNA-Seq	26793951
11	DPAGT1	prefrontal cortex	0.23	0.000246	UP	RNA-Seq	26793951
1	DPM3	skin	-1.03	3.68e-05	DOWN	RNA-Seq	28068941
1	DRAXIN	peripheral blood	0.89	0.0002	UP	RNA-seq	25475535
3	DRD3	prefrontal cortex	-0.75	0.000785	DOWN	RNA-Seq	26793951
5	DROSHA	prefrontal cortex	-0.16	0.00182	DOWN	RNA-Seq	26793951
4	DTHD1	skin	1.15	1.09e-05	UP	RNA-Seq	28068941
5	DTWD2	prefrontal cortex	-0.44	0.000186	DOWN	RNA-Seq	26793951
7	DTX2	prefrontal cortex	0.37	0.00134	UP	RNA-Seq	26793951
19	DUS3L	skin	-1.42	1.16e-10	DOWN	RNA-Seq	28068941
7	DUS4L	prefrontal cortex	-0.38	0.000189	DOWN	RNA-Seq	26793951
2	DUSP2	skin	-0.84	7.54e-05	DOWN	RNA-Seq	28068941
6	DUSP22	skin	-0.66	0.000369	DOWN	RNA-Seq	28068941
1	DUSP23	skin	-0.68	0.000452	DOWN	RNA-Seq	28068941
8	DUSP4	prefrontal cortex	-0.76	0.000257	DOWN	RNA-Seq	26793951
X	DUSP9	prefrontal cortex	0.54	0.000736	UP	RNA-Seq	26793951
1	DVL1	skin	-0.74	0.000132	DOWN	RNA-Seq	28068941
10	DYDC2	prefrontal cortex	-0.67	0.00222	DOWN	RNA-Seq	26793951
12	DYNLL1	skin	-0.58	0.00222	DOWN	RNA-Seq	28068941
20	DZANK1	prefrontal cortex	-0.24	0.00142	DOWN	RNA-Seq	26793951
16	E2F4	prefrontal cortex	0.27	0.000381	UP	RNA-Seq	26793951
16	E4F1	skin	-0.95	4.74e-05	DOWN	RNA-Seq	28068941
19	EBI3	prefrontal cortex	0.63	0.000425	UP	RNA-Seq	26793951
X	EBP	skin	-0.79	9.03e-05	DOWN	RNA-Seq	28068941
13	EBPL	skin	-0.62	0.000405	DOWN	RNA-Seq	28068941
10	ECD	prefrontal cortex	-0.24	0.000698	DOWN	RNA-Seq	26793951
10	ECHDC3	prefrontal cortex	0.55	0.0017	UP	RNA-Seq	26793951
10	ECHDC3	skin	-0.78	0.000126	DOWN	RNA-Seq	28068941
X	EDA2R	skin	0.6	0.000752	UP	RNA-Seq	28068941
4	EEF1A1P9	skin	-0.71	3.61e-05	DOWN	RNA-Seq	28068941
8	EEF1D	skin	-0.65	0.000397	DOWN	RNA-Seq	28068941
7	EFCAB10	prefrontal cortex	-0.43	0.00162	DOWN	RNA-Seq	26793951
11	EFCAB4A	prefrontal cortex	0.46	0.000395	UP	RNA-Seq	26793951
22	EFCAB6	prefrontal cortex	-0.47	0.00056	DOWN	RNA-Seq	26793951
1	EFNA1	skin	-0.61	0.00103	DOWN	RNA-Seq	28068941
X	EGFL6	skin	-0.96	0.000162	DOWN	RNA-Seq	28068941
6	EGFL8	prefrontal cortex	0.38	0.00177	UP	RNA-Seq	26793951
9	EHMT1	prefrontal cortex	0.31	0.00236	UP	RNA-Seq	26793951
Y	EIF1AY	skin	-1	1.09e-05	DOWN	RNA-Seq	28068941
3	EIF1B	skin	-0.6	0.000766	DOWN	RNA-Seq	28068941
17	EIF4A3	skin	-0.63	0.00021	DOWN	RNA-Seq	28068941
8	EIF4EBP1	prefrontal cortex	0.43	0.00198	UP	RNA-Seq	26793951
8	EIF4EBP1	skin	-0.86	0.000339	DOWN	RNA-Seq	28068941
19	ELANE	skin	-1.37	0.000114	DOWN	RNA-Seq	28068941
19	ELANE	skin	-1.37	0.000114	DOWN	RNA-Seq	28068941
19	ELL	skin	-0.64	0.00201	DOWN	RNA-Seq	28068941
1	ELOVL1	skin	-0.65	0.0015	DOWN	RNA-Seq	28068941
10	ELOVL3	skin	-1.38	4.4e-10	DOWN	RNA-Seq	28068941
18	ELP2	prefrontal cortex	-0.17	0.000688	DOWN	RNA-Seq	26793951
20	EMILIN3	skin	-0.72	0.000193	DOWN	RNA-Seq	28068941
19	EMP3	prefrontal cortex	0.55	0.000527	UP	RNA-Seq	26793951
19	EMR3	skin	-1.28	0.000106	DOWN	RNA-Seq	28068941
10	EMX2	prefrontal cortex	0.5	0.00287	UP	RNA-Seq	26793951
7	EN2	prefrontal cortex	-0.71	0.00273	DOWN	RNA-Seq	26793951
11	ENDOD1	prefrontal cortex	-0.4	0.00164	DOWN	RNA-Seq	26793951
9	ENDOG	skin	-0.81	0.000459	DOWN	RNA-Seq	28068941
12	ENDOU	skin	-0.56	0.00149	DOWN	RNA-Seq	28068941
18	ENOSF1	prefrontal cortex	-0.69	0.000258	DOWN	RNA-Seq	26793951
17	ENTHD2	prefrontal cortex	0.35	0.000983	UP	RNA-Seq	26793951
14	ENTPD5	prefrontal cortex	-0.35	0.000359	DOWN	RNA-Seq	26793951
3	EOMES	prefrontal cortex	-0.73	0.000493	DOWN	RNA-Seq	26793951
18	EPB41L3	prefrontal cortex	-0.29	0.00112	DOWN	RNA-Seq	26793951
1	EPHA2	prefrontal cortex	0.81	4.09e-06	UP	RNA-Seq	26793951
3	EPHA6	skin	0.76	0.000469	UP	RNA-Seq	28068941
3	EPM2AIP1	prefrontal cortex	-0.17	0.00293	DOWN	RNA-Seq	26793951
19	EPOR	prefrontal cortex	0.51	5.66e-06	UP	RNA-Seq	26793951
20	EPPIN	prefrontal cortex	0.78	0.000463	UP	RNA-Seq	26793951
19	EPS8L1	prefrontal cortex	0.66	0.000454	UP	RNA-Seq	26793951
19	EPS8L1	skin	-0.85	5.19e-06	DOWN	RNA-Seq	28068941
19	EPS8L1	skin	-0.85	5.19e-06	DOWN	RNA-Seq	28068941
19	EPS8L1	skin	-0.85	5.19e-06	DOWN	RNA-Seq	28068941
19	EPS8L1	skin	-0.85	5.19e-06	DOWN	RNA-Seq	28068941
19	EPS8L1	skin	-0.85	5.19e-06	DOWN	RNA-Seq	28068941
19	EPS8L1	skin	-0.85	5.19e-06	DOWN	RNA-Seq	28068941
19	EPS8L1	skin	-0.85	5.19e-06	DOWN	RNA-Seq	28068941
19	EPS8L1	skin	-0.85	5.19e-06	DOWN	RNA-Seq	28068941
19	EPS8L1	skin	-0.85	5.19e-06	DOWN	RNA-Seq	28068941
11	EPS8L2	skin	-0.75	5.78e-05	DOWN	RNA-Seq	28068941
16	ERI2	prefrontal cortex	-0.4	0.000865	DOWN	RNA-Seq	26793951
12	ERP27	skin	0.71	0.000451	UP	RNA-Seq	28068941
12	ERP29	skin	-0.6	0.00131	DOWN	RNA-Seq	28068941
7	ERVW-1	prefrontal cortex	-0.75	0.000226	DOWN	RNA-Seq	26793951
5	ESM1	skin	1.6	0.00167	UP	RNA-Seq	28068941
12	ETNK1	blood	-0.22	0.000216	DOWN	RNA-seq	28916538
7	ETV1	skin	0.62	0.00209	UP	RNA-Seq	28068941
17	ETV4	prefrontal cortex	0.93	1.55e-05	UP	RNA-Seq	26793951
6	ETV7	skin	-0.69	0.000721	DOWN	RNA-Seq	28068941
1	EVA1B	prefrontal cortex	0.5	2.63e-05	UP	RNA-Seq	26793951
4	EVC2	prefrontal cortex	0.74	3.63e-05	UP	RNA-Seq	26793951
2	EXOC6B	prefrontal cortex	-0.26	0.000729	DOWN	RNA-Seq	26793951
3	EXOG	prefrontal cortex	-0.29	0.00112	DOWN	RNA-Seq	26793951
3	EXOSC7	skin	-0.6	0.00111	DOWN	RNA-Seq	28068941
20	EYA2	prefrontal cortex	0.56	0.000329	UP	RNA-Seq	26793951
6	EZR	prefrontal cortex	0.45	0.00248	UP	RNA-Seq	26793951
16	FA2H	skin	-1.11	1.39e-07	DOWN	RNA-Seq	28068941
8	FABP4	skin	-0.73	1.34e-05	DOWN	RNA-Seq	28068941
6	FABP7	skin	-0.67	0.00148	DOWN	RNA-Seq	28068941
15	FAH	skin	-0.69	0.00071	DOWN	RNA-Seq	28068941
17	FAM100B	skin	-0.72	0.000208	DOWN	RNA-Seq	28068941
17	FAM106C	skin	1.4	0.000602	UP	RNA-Seq	28068941
12	FAM109A	prefrontal cortex	0.35	0.000106	UP	RNA-Seq	26793951
9	FAM120AOS	prefrontal cortex	-0.21	0.0008	DOWN	RNA-Seq	26793951
9	FAM129B	prefrontal cortex	0.43	0.00292	UP	RNA-Seq	26793951
2	FAM150B	prefrontal cortex	-0.69	0.000307	DOWN	RNA-Seq	26793951
-	FAM156B_dup1	skin	-2.28	0.00119	DOWN	RNA-Seq	28068941
3	FAM162A	skin	-0.58	0.00157	DOWN	RNA-Seq	28068941
9	FAM166A	skin	-0.78	7.28e-05	DOWN	RNA-Seq	28068941
1	FAM167B	prefrontal cortex	0.98	3.28e-07	UP	RNA-Seq	26793951
2	FAM171B	skin	0.58	0.00183	UP	RNA-Seq	28068941
5	FAM174A	skin	-0.58	0.00184	DOWN	RNA-Seq	28068941
11	FAM181B	prefrontal cortex	0.4	0.0026	UP	RNA-Seq	26793951
1	FAM183A	prefrontal cortex	-0.68	0.00306	DOWN	RNA-Seq	26793951
10	FAM188A	prefrontal cortex	-0.32	0.000331	DOWN	RNA-Seq	26793951
5	FAM193B	blood	0.14	0.000224	UP	RNA-seq	28916538
16	FAM195A	prefrontal cortex	0.44	0.000748	UP	RNA-Seq	26793951
13	FAM216B	prefrontal cortex	-0.92	2.68e-05	DOWN	RNA-Seq	26793951
9	FAM221B	prefrontal cortex	-0.71	0.000609	DOWN	RNA-Seq	26793951
1	FAM229A	prefrontal cortex	0.57	3.36e-05	UP	RNA-Seq	26793951
10	FAM25A	skin	-1.3	4.31e-11	DOWN	RNA-Seq	28068941
3	FAM43A	skin	-0.58	0.00178	DOWN	RNA-Seq	28068941
4	FAM47E	prefrontal cortex	-0.37	0.0011	DOWN	RNA-Seq	26793951
6	FAM50B	skin	-0.69	0.00138	DOWN	RNA-Seq	28068941
1	FAM5B	skin	1.05	0.000141	UP	RNA-Seq	28068941
20	FAM65C	prefrontal cortex	1.01	6.31e-09	UP	RNA-Seq	26793951
9	FAM69B	skin	-0.72	0.000298	DOWN	RNA-Seq	28068941
1	FAM73A	prefrontal cortex	-0.46	0.00243	DOWN	RNA-Seq	26793951
9	FAM73B	skin	-0.91	2.28e-05	DOWN	RNA-Seq	28068941
20	FAM83D	prefrontal cortex	0.43	0.00213	UP	RNA-Seq	26793951
8	FAM86B1	prefrontal cortex	-0.39	0.00121	DOWN	RNA-Seq	26793951
8	FAM86B1	skin	-1.12	0.00138	DOWN	RNA-Seq	28068941
8	FAM86B2	prefrontal cortex	-0.42	0.0016	DOWN	RNA-Seq	26793951
3	FANCD2	prefrontal cortex	-0.44	0.000268	DOWN	RNA-Seq	26793951
6	FANCE	skin	-0.65	0.000645	DOWN	RNA-Seq	28068941
2	FASTKD2	prefrontal cortex	-0.27	0.00306	DOWN	RNA-Seq	26793951
5	FAT2	prefrontal cortex	-1.23	1.66e-07	DOWN	RNA-Seq	26793951
11	FAU	skin	-0.7	3.93e-05	DOWN	RNA-Seq	28068941
22	FBLN1	prefrontal cortex	0.57	5.74e-05	UP	RNA-Seq	26793951
15	FBN1	prefrontal cortex	-0.35	0.00205	DOWN	RNA-Seq	26793951
9	FBP1	skin	-1.23	1.18e-08	DOWN	RNA-Seq	28068941
10	FBXL15	skin	-0.96	0.00012	DOWN	RNA-Seq	28068941
15	FBXL22	prefrontal cortex	-0.55	0.000822	DOWN	RNA-Seq	26793951
1	FBXO2	prefrontal cortex	0.43	0.000168	UP	RNA-Seq	26793951
2	FBXO36	prefrontal cortex	-0.43	9.35e-05	DOWN	RNA-Seq	26793951
9	FBXW2	prefrontal cortex	-0.27	0.00134	DOWN	RNA-Seq	26793951
19	FCER2	peripheral blood	-0.67	5.87e-05	DOWN	RNA-seq	25475535
1	FCGR3B	skin	-1.76	1.22e-07	DOWN	RNA-Seq	28068941
19	FCGRT	prefrontal cortex	0.43	0.000499	UP	RNA-Seq	26793951
19	FCGRT	skin	-0.56	0.00184	DOWN	RNA-Seq	28068941
17	FDXR	skin	-0.99	9.38e-07	DOWN	RNA-Seq	28068941
15	FES	prefrontal cortex	0.44	0.000805	UP	RNA-Seq	26793951
8	FGF17	prefrontal cortex	0.59	0.000586	UP	RNA-Seq	26793951
15	FGF7	skin	0.65	0.000999	UP	RNA-Seq	28068941
13	FGF9	skin	0.66	0.000378	UP	RNA-Seq	28068941
4	FGFBP2	skin	-0.93	6.81e-06	DOWN	RNA-Seq	28068941
4	FGFR3	skin	-0.64	0.00113	DOWN	RNA-Seq	28068941
1	FGR	prefrontal cortex	0.55	0.000895	UP	RNA-Seq	26793951
1	FGR	skin	-0.64	0.000315	DOWN	RNA-Seq	28068941
16	FHOD1	prefrontal cortex	0.35	0.00279	UP	RNA-Seq	26793951
6	FILIP1	skin	0.69	0.000274	UP	RNA-Seq	28068941
7	FIS1	skin	-0.72	0.000105	DOWN	RNA-Seq	28068941
14	FITM1	prefrontal cortex	0.73	0.000261	UP	RNA-Seq	26793951
20	FKBP1A	blood	0.2	2.84e-07	UP	RNA-seq	28916538
20	FKBP1A	blood	0.15	8.38e-07	UP	RNA-seq	28916538
20	FKBP1A	blood	0.16	0.000107	UP	RNA-seq	28916538
12	FKBP4	prefrontal cortex	0.57	0.000188	UP	RNA-Seq	26793951
6	FKBP5	prefrontal cortex	0.64	0.000449	UP	RNA-Seq	26793951
5	FKSG61	prefrontal cortex	0.7	0.00297	UP	RNA-Seq	26793951
9	FKTN	prefrontal cortex	-0.33	0.00109	DOWN	RNA-Seq	26793951
17	FLCN	prefrontal cortex	0.31	0.00306	UP	RNA-Seq	26793951
-	FLJ36031	skin	-0.65	0.00208	DOWN	RNA-Seq	28068941
1	FLJ37453	skin	-1.08	1.81e-05	DOWN	RNA-Seq	28068941
-	FLJ45244	skin	-0.87	0.0002	DOWN	RNA-Seq	28068941
13	FLT3	prefrontal cortex	-0.67	0.00136	DOWN	RNA-Seq	26793951
19	FLT3LG	prefrontal cortex	0.4	0.00179	UP	RNA-Seq	26793951
5	FLT4	prefrontal cortex	0.44	0.00264	UP	RNA-Seq	26793951
11	FOLR1	skin	0.86	0.000579	UP	RNA-Seq	28068941
14	FOS	skin	-0.49	0.000718	DOWN	RNA-Seq	28068941
9	FOXD4	prefrontal cortex	0.54	0.00152	UP	RNA-Seq	26793951
16	FOXF1	prefrontal cortex	0.59	0.00251	UP	RNA-Seq	26793951
16	FOXF1	skin	1.35	0.000769	UP	RNA-Seq	28068941
6	FOXF2	skin	-0.87	0.00121	DOWN	RNA-Seq	28068941
8	FOXH1	skin	-1.17	2.87e-09	DOWN	RNA-Seq	28068941
17	FOXJ1	prefrontal cortex	0.73	0.00095	UP	RNA-Seq	26793951
1	FPGT-TNNI3K	prefrontal cortex	-0.6	0.000116	DOWN	RNA-Seq	26793951
19	FPR1	skin	-1.26	1.49e-09	DOWN	RNA-Seq	28068941
19	FPR1	skin	-1.26	1.49e-09	DOWN	RNA-Seq	28068941
10	FRAT2	prefrontal cortex	0.31	0.00124	UP	RNA-Seq	26793951
9	FRRS1L	prefrontal cortex	-0.85	7.39e-05	DOWN	RNA-Seq	26793951
19	FSTL3	skin	-0.7	0.00116	DOWN	RNA-Seq	28068941
15	FURIN	prefrontal cortex	0.25	0.00298	UP	RNA-Seq	26793951
11	FXYD2	prefrontal cortex	0.98	1.24e-09	UP	RNA-Seq	26793951
10	FZD8	prefrontal cortex	0.59	0.000365	UP	RNA-Seq	26793951
7	FZD9	prefrontal cortex	0.62	3.06e-05	UP	RNA-Seq	26793951
1	G0S2	prefrontal cortex	1.51	1.01e-11	UP	RNA-Seq	26793951
1	G0S2	skin	-0.72	0.000672	DOWN	RNA-Seq	28068941
X	G6PD	blood	0.14	4.81e-05	UP	RNA-seq	28916538
5	GABRA6	prefrontal cortex	-1.23	2.2e-07	DOWN	RNA-Seq	26793951
19	GADD45B	skin	-0.61	0.00228	DOWN	RNA-Seq	28068941
19	GADD45GIP1	skin	-1.03	5.7e-05	DOWN	RNA-Seq	28068941
X	GAGE10	prefrontal cortex	0.79	0.000417	UP	RNA-Seq	26793951
11	GAL	skin	-0.94	5.25e-05	DOWN	RNA-Seq	28068941
2	GALM	prefrontal cortex	0.45	0.00093	UP	RNA-Seq	26793951
16	GALNS	skin	-0.7	0.000457	DOWN	RNA-Seq	28068941
2	GALNT13	prefrontal cortex	-0.45	0.000514	DOWN	RNA-Seq	26793951
2	GALNT5	prefrontal cortex	-0.66	0.00176	DOWN	RNA-Seq	26793951
2	GALNT5	skin	0.77	9.63e-05	UP	RNA-Seq	28068941
3	GALNTL2	skin	-0.78	3.64e-06	DOWN	RNA-Seq	28068941
18	GALR1	skin	1.35	0.00033	UP	RNA-Seq	28068941
19	GAMT	skin	-1.02	0.000388	DOWN	RNA-Seq	28068941
2	GAREML	prefrontal cortex	0.69	1.77e-05	UP	RNA-Seq	26793951
21	GART	prefrontal cortex	-0.18	0.00206	DOWN	RNA-Seq	26793951
9	GAS1	prefrontal cortex	0.63	0.000696	UP	RNA-Seq	26793951
12	GAS2L3	prefrontal cortex	0.58	0.000296	UP	RNA-Seq	26793951
17	GAS7	prefrontal cortex	-0.35	0.000824	DOWN	RNA-Seq	26793951
16	GDPD3	prefrontal cortex	0.57	0.000572	UP	RNA-Seq	26793951
8	GEM	prefrontal cortex	0.61	0.000769	UP	RNA-Seq	26793951
2	GEN1	prefrontal cortex	-0.3	0.00125	DOWN	RNA-Seq	26793951
3	GFM1	prefrontal cortex	-0.26	0.0022	DOWN	RNA-Seq	26793951
5	GFPT2	prefrontal cortex	0.27	0.00308	UP	RNA-Seq	26793951
22	GGT5	skin	-0.96	2.76e-06	DOWN	RNA-Seq	28068941
1	GJA4	prefrontal cortex	0.65	0.00173	UP	RNA-Seq	26793951
17	GJC1	prefrontal cortex	0.41	0.00306	UP	RNA-Seq	26793951
12	GLI1	prefrontal cortex	0.65	0.00113	UP	RNA-Seq	26793951
1	GLRX2	skin	-0.66	0.00143	DOWN	RNA-Seq	28068941
14	GLRX5	skin	-0.87	2.71e-06	DOWN	RNA-Seq	28068941
3	GLT8D1	prefrontal cortex	-0.16	0.00147	DOWN	RNA-Seq	26793951
1	GLTPD1	skin	-1.02	0.000357	DOWN	RNA-Seq	28068941
19	GLTSCR2	skin	-0.57	0.00174	DOWN	RNA-Seq	28068941
11	GLYATL2	skin	0.94	4.54e-05	UP	RNA-Seq	28068941
1	GNAI3	blood	-0.12	0.000151	DOWN	RNA-seq	28916538
7	GNG11	skin	-0.6	0.000635	DOWN	RNA-Seq	28068941
1	GNG5	skin	-0.92	7.01e-07	DOWN	RNA-Seq	28068941
4	GNRHR	skin	0.97	5.97e-06	UP	RNA-Seq	28068941
10	GOLGA7B	skin	-0.7	0.000642	DOWN	RNA-Seq	28068941
1	GOLPH3L	prefrontal cortex	0.22	0.00233	UP	RNA-Seq	26793951
22	GP1BB	skin	-1.1	3.53e-05	DOWN	RNA-Seq	28068941
13	GPALPP1	prefrontal cortex	-0.26	0.00155	DOWN	RNA-Seq	26793951
2	GPC1	skin	-0.72	0.00027	DOWN	RNA-Seq	28068941
7	GPC2	skin	-0.88	4.59e-05	DOWN	RNA-Seq	28068941
X	GPC3	skin	0.59	0.00122	UP	RNA-Seq	28068941
13	GPC6	skin	0.61	0.00178	UP	RNA-Seq	28068941
20	GPCPD1	prefrontal cortex	-0.5	5.71e-05	DOWN	RNA-Seq	26793951
7	GPER1	prefrontal cortex	0.68	1.12e-06	UP	RNA-Seq	26793951
14	GPR137C	prefrontal cortex	-0.41	0.000614	DOWN	RNA-Seq	26793951
3	GPR149	prefrontal cortex	-1.08	6.49e-06	DOWN	RNA-Seq	26793951
8	GPR172A	skin	-0.77	0.000235	DOWN	RNA-Seq	28068941
17	GPR172B	skin	-0.97	1.91e-05	DOWN	RNA-Seq	28068941
2	GPR35	prefrontal cortex	0.52	0.000124	UP	RNA-Seq	26793951
19	GPR4	prefrontal cortex	0.94	6.88e-06	UP	RNA-Seq	26793951
16	GPR97	prefrontal cortex	0.69	0.00301	UP	RNA-Seq	26793951
12	GPRC5A	skin	0.74	0.000146	UP	RNA-Seq	28068941
6	GPSM3	prefrontal cortex	0.64	1.65e-05	UP	RNA-Seq	26793951
6	GPSM3	skin	-0.62	0.00229	DOWN	RNA-Seq	28068941
6	GPSM3	skin	-0.62	0.00229	DOWN	RNA-Seq	28068941
6	GPSM3	skin	-0.62	0.00229	DOWN	RNA-Seq	28068941
6	GPSM3	skin	-0.62	0.00229	DOWN	RNA-Seq	28068941
6	GPSM3	skin	-0.62	0.00229	DOWN	RNA-Seq	28068941
6	GPSM3	skin	-0.62	0.00229	DOWN	RNA-Seq	28068941
6	GPSM3	skin	-0.62	0.00229	DOWN	RNA-Seq	28068941
6	GPSM3	skin	-0.62	0.00229	DOWN	RNA-Seq	28068941
6	GPSM3	skin	-0.62	0.00229	DOWN	RNA-Seq	28068941
16	GPT2	skin	-0.86	5.57e-06	DOWN	RNA-Seq	28068941
3	GPX1	skin	-0.83	9.9e-06	DOWN	RNA-Seq	28068941
22	GRAMD4	skin	-0.66	0.000203	DOWN	RNA-Seq	28068941
22	GRAP2	skin	0.75	0.000775	UP	RNA-Seq	28068941
18	GREB1L	prefrontal cortex	-0.86	1.56e-05	DOWN	RNA-Seq	26793951
X	GRIA3	skin	0.51	0.00148	UP	RNA-Seq	28068941
11	GRIA4	skin	0.66	0.000893	UP	RNA-Seq	28068941
19	GRIN3B	skin	-0.88	0.00019	DOWN	RNA-Seq	28068941
17	GRN	prefrontal cortex	0.32	0.000818	UP	RNA-Seq	26793951
19	GRWD1	skin	-0.84	0.000101	DOWN	RNA-Seq	28068941
7	GSAP	prefrontal cortex	-0.31	0.00221	DOWN	RNA-Seq	26793951
8	GSDMD	prefrontal cortex	0.47	0.00114	UP	RNA-Seq	26793951
4	GSTCD	prefrontal cortex	-0.32	0.00248	DOWN	RNA-Seq	26793951
1	GSTM1	skin	1.6	1.21e-12	UP	RNA-Seq	28068941
10	GSTO1	skin	-0.61	0.00121	DOWN	RNA-Seq	28068941
10	GSTO2	skin	-0.64	0.000968	DOWN	RNA-Seq	28068941
11	GSTP1	skin	-0.64	0.000267	DOWN	RNA-Seq	28068941
12	GTF2H3	prefrontal cortex	-0.23	0.00232	DOWN	RNA-Seq	26793951
6	GTF2H5	prefrontal cortex	-0.26	0.00096	DOWN	RNA-Seq	26793951
7	GTPBP10	prefrontal cortex	-0.22	0.00274	DOWN	RNA-Seq	26793951
13	GUCY1B2	skin	-1.44	4.26e-06	DOWN	RNA-Seq	28068941
17	GUCY2D	skin	-1.65	0.0005	DOWN	RNA-Seq	28068941
1	GUK1	skin	-0.73	0.000197	DOWN	RNA-Seq	28068941
6	HACE1	prefrontal cortex	-0.35	0.000379	DOWN	RNA-Seq	26793951
3	HACL1	prefrontal cortex	-0.42	6.51e-06	DOWN	RNA-Seq	26793951
1	HAO2	skin	-0.76	0.00134	DOWN	RNA-Seq	28068941
1	HAX1	skin	-0.62	0.000956	DOWN	RNA-Seq	28068941
1	HAX1	skin	-0.62	0.000956	DOWN	RNA-Seq	28068941
16	HBA2	skin	-2.05	2.48e-13	DOWN	RNA-Seq	28068941
11	HBB	prefrontal cortex	-0.68	0.00269	DOWN	RNA-Seq	26793951
11	HBB	skin	-0.76	6.44e-05	DOWN	RNA-Seq	28068941
11	HBG1	peripheral blood	-0.79	0.0008	DOWN	RNA-seq	25475535
6	HBS1L	prefrontal cortex	-0.45	8.58e-05	DOWN	RNA-Seq	26793951
6	HCG26	skin	-0.6	0.00177	DOWN	RNA-Seq	28068941
3	HCLS1	prefrontal cortex	0.64	0.000611	UP	RNA-Seq	26793951
3	HCLS1	skin	-0.66	0.000394	DOWN	RNA-Seq	28068941
5	HCN1	skin	1.23	3.43e-05	UP	RNA-Seq	28068941
17	HCRT	skin	2.62	0.000229	UP	RNA-Seq	28068941
22	HDAC10	prefrontal cortex	0.52	6.24e-05	UP	RNA-Seq	26793951
15	HDDC3	skin	-0.81	6.99e-05	DOWN	RNA-Seq	28068941
1	HDGF	prefrontal cortex	0.22	0.000736	UP	RNA-Seq	26793951
2	HEATR5B	prefrontal cortex	-0.23	0.00161	DOWN	RNA-Seq	26793951
2	HECW2	prefrontal cortex	-0.62	4.12e-06	DOWN	RNA-Seq	26793951
15	HERC1	prefrontal cortex	-0.27	0.000127	DOWN	RNA-Seq	26793951
1	HES5	skin	-1.14	0.000679	DOWN	RNA-Seq	28068941
17	HES7	prefrontal cortex	0.66	0.000546	UP	RNA-Seq	26793951
3	HESX1	skin	-1.62	2.64e-05	DOWN	RNA-Seq	28068941
15	HEXA	prefrontal cortex	-0.19	0.00257	DOWN	RNA-Seq	26793951
17	HEXIM1	prefrontal cortex	0.27	0.00301	UP	RNA-Seq	26793951
1	HFM1	skin	0.9	0.0013	UP	RNA-Seq	28068941
3	HGD	skin	-1.07	0.000212	DOWN	RNA-Seq	28068941
3	HHLA2	prefrontal cortex	-0.72	0.000256	DOWN	RNA-Seq	26793951
9	HIATL2	prefrontal cortex	-0.46	0.00307	DOWN	RNA-Seq	26793951
17	HIC1	prefrontal cortex	0.71	7.11e-05	UP	RNA-Seq	26793951
19	HIF3A	prefrontal cortex	0.82	1.24e-05	UP	RNA-Seq	26793951
17	HIGD1B	prefrontal cortex	0.71	1.34e-05	UP	RNA-Seq	26793951
9	HINT2	skin	-0.76	4.34e-05	DOWN	RNA-Seq	28068941
6	HIST1H1D	skin	0.6	0.0015	UP	RNA-Seq	28068941
6	HIST1H3C	skin	1.17	0.00161	UP	RNA-Seq	28068941
6	HIVEP2	prefrontal cortex	-0.33	0.00217	DOWN	RNA-Seq	26793951
5	HK3	prefrontal cortex	0.65	0.000254	UP	RNA-Seq	26793951
6	HLA-DQA2	skin	0.71	1.36e-05	UP	RNA-Seq	28068941
6	HLA-DQA2	skin	0.71	1.36e-05	UP	RNA-Seq	28068941
6	HLA-DQA2	skin	0.71	1.36e-05	UP	RNA-Seq	28068941
6	HLA-DQA2	skin	0.71	1.36e-05	UP	RNA-Seq	28068941
6	HLA-DQA2	skin	0.71	1.36e-05	UP	RNA-Seq	28068941
6	HLA-DQA2	skin	0.71	1.36e-05	UP	RNA-Seq	28068941
6	HLA-DQA2	skin	0.71	1.36e-05	UP	RNA-Seq	28068941
6	HLA-DQA2	skin	0.71	1.36e-05	UP	RNA-Seq	28068941
21	HLCS	prefrontal cortex	-0.3	0.00143	DOWN	RNA-Seq	26793951
3	HLTF	prefrontal cortex	-0.37	0.000352	DOWN	RNA-Seq	26793951
1	HLX	prefrontal cortex	0.42	0.000879	UP	RNA-Seq	26793951
8	HMBOX1	prefrontal cortex	0.33	0.00133	UP	RNA-Seq	26793951
15	HMG20A	prefrontal cortex	-0.2	0.00112	DOWN	RNA-Seq	26793951
1	HMGCL	skin	-0.72	0.000485	DOWN	RNA-Seq	28068941
6	HMGN3	skin	-0.59	0.00159	DOWN	RNA-Seq	28068941
19	HMHA1	prefrontal cortex	0.45	3.48e-05	UP	RNA-Seq	26793951
19	HOOK2	prefrontal cortex	0.4	0.000546	UP	RNA-Seq	26793951
1	HORMAD1	skin	0.84	7.41e-05	UP	RNA-Seq	28068941
17	HOXB2	skin	-1.02	1.54e-05	DOWN	RNA-Seq	28068941
16	HP	prefrontal cortex	0.77	0.0013	UP	RNA-Seq	26793951
11	HRAS	skin	-0.95	1.45e-06	DOWN	RNA-Seq	28068941
18	HRH4	prefrontal cortex	0.7	0.00248	UP	RNA-Seq	26793951
16	HS3ST4	skin	0.96	3.21e-05	UP	RNA-Seq	28068941
16	HS3ST6	skin	-1.15	2.21e-05	DOWN	RNA-Seq	28068941
13	HS6ST3	prefrontal cortex	-0.85	0.000293	DOWN	RNA-Seq	26793951
16	HSD11B2	prefrontal cortex	0.74	0.000423	UP	RNA-Seq	26793951
11	HSD17B12	prefrontal cortex	-0.31	0.00305	DOWN	RNA-Seq	26793951
16	HSD17B2	skin	-0.81	0.00143	DOWN	RNA-Seq	28068941
6	HSD17B8	skin	-0.72	0.000207	DOWN	RNA-Seq	28068941
6	HSD17B8	skin	-0.72	0.000207	DOWN	RNA-Seq	28068941
6	HSD17B8	skin	-0.72	0.000207	DOWN	RNA-Seq	28068941
6	HSD17B8	skin	-0.72	0.000207	DOWN	RNA-Seq	28068941
6	HSD17B8	skin	-0.72	0.000207	DOWN	RNA-Seq	28068941
6	HSD17B8	skin	-0.72	0.000207	DOWN	RNA-Seq	28068941
16	HSD3B7	prefrontal cortex	0.45	0.00241	UP	RNA-Seq	26793951
8	HSF1	prefrontal cortex	0.28	0.00237	UP	RNA-Seq	26793951
12	HSP90B1	blood	-0.15	0.000157	DOWN	RNA-seq	28916538
10	HSPA14	prefrontal cortex	-0.22	0.000926	DOWN	RNA-Seq	26793951
6	HSPA1A	prefrontal cortex	1.49	4.46e-11	UP	RNA-Seq	26793951
6	HSPA1B	prefrontal cortex	1.29	2.96e-09	UP	RNA-Seq	26793951
6	HSPA1L	prefrontal cortex	0.52	0.000234	UP	RNA-Seq	26793951
1	HSPA6	prefrontal cortex	1.83	1.77e-14	UP	RNA-Seq	26793951
7	HSPB1	prefrontal cortex	1.3	3.19e-10	UP	RNA-Seq	26793951
11	HSPB2	prefrontal cortex	0.44	0.000656	UP	RNA-Seq	26793951
11	HSPB2	skin	-1.06	4.44e-07	DOWN	RNA-Seq	28068941
17	HSPB9	prefrontal cortex	0.91	1.83e-05	UP	RNA-Seq	26793951
16	HTA	skin	3.04	0.0007	UP	RNA-Seq	28068941
X	HTR2C	prefrontal cortex	-0.92	9.05e-05	DOWN	RNA-Seq	26793951
5	HTR4	prefrontal cortex	-0.65	0.00124	DOWN	RNA-Seq	26793951
4	HTRA3	skin	-0.68	0.00111	DOWN	RNA-Seq	28068941
6	IBTK	prefrontal cortex	-0.3	0.000745	DOWN	RNA-Seq	26793951
20	ID1	skin	-1.32	2.47e-11	DOWN	RNA-Seq	28068941
X	IDS	blood	0.14	0.000181	UP	RNA-seq	28916538
19	IER2	skin	-0.62	0.00096	DOWN	RNA-Seq	28068941
6	IER3	skin	-0.74	5.87e-05	DOWN	RNA-Seq	28068941
6	IER3	skin	-0.74	5.87e-05	DOWN	RNA-Seq	28068941
6	IER3	skin	-0.74	5.87e-05	DOWN	RNA-Seq	28068941
6	IER3	skin	-0.74	5.87e-05	DOWN	RNA-Seq	28068941
6	IER3	skin	-0.74	5.87e-05	DOWN	RNA-Seq	28068941
6	IER3	skin	-0.74	5.87e-05	DOWN	RNA-Seq	28068941
1	IER5	skin	-0.57	0.00227	DOWN	RNA-Seq	28068941
14	IFI27	skin	-0.61	0.000169	DOWN	RNA-Seq	28068941
19	IFI30	skin	-0.42	0.000749	DOWN	RNA-Seq	28068941
11	IFITM1	skin	-0.58	0.00113	DOWN	RNA-Seq	28068941
11	IFITM3	skin	-0.66	7.35e-05	DOWN	RNA-Seq	28068941
11	IFITM5	prefrontal cortex	0.73	0.00227	UP	RNA-Seq	26793951
9	IFNA2	prefrontal cortex	0.88	0.000213	UP	RNA-Seq	26793951
22	IFT27	prefrontal cortex	-0.25	0.0016	DOWN	RNA-Seq	26793951
20	IFT52	prefrontal cortex	-0.23	0.000479	DOWN	RNA-Seq	26793951
15	IGF1R	prefrontal cortex	0.23	0.00224	UP	RNA-Seq	26793951
11	IGF2	skin	0.64	0.000777	UP	RNA-Seq	28068941
12	IGFBP6	skin	-0.67	0.000486	DOWN	RNA-Seq	28068941
9	IGFBPL1	prefrontal cortex	-0.65	0.00268	DOWN	RNA-Seq	26793951
19	IGFL2	prefrontal cortex	-0.73	0.00127	DOWN	RNA-Seq	26793951
19	IGFL2	skin	-0.71	0.000351	DOWN	RNA-Seq	28068941
4	IGJ	prefrontal cortex	0.79	0.00101	UP	RNA-Seq	26793951
22	IGLL5	skin	1.35	8.17e-07	UP	RNA-Seq	28068941
3	IGSF10	skin	0.73	3.23e-05	UP	RNA-Seq	28068941
2	IHH	prefrontal cortex	0.83	0.000169	UP	RNA-Seq	26793951
10	IL15RA	prefrontal cortex	0.48	0.00232	UP	RNA-Seq	26793951
3	IL17RB	prefrontal cortex	0.65	2.39e-06	UP	RNA-Seq	26793951
22	IL17REL	prefrontal cortex	-0.82	0.000528	DOWN	RNA-Seq	26793951
2	IL1F10	skin	-0.86	4.26e-05	DOWN	RNA-Seq	28068941
2	IL1R2	prefrontal cortex	0.92	9.87e-05	UP	RNA-Seq	26793951
X	IL2RG	prefrontal cortex	0.6	0.000218	UP	RNA-Seq	26793951
5	IL31RA	skin	0.92	0.00103	UP	RNA-Seq	28068941
16	IL4R	prefrontal cortex	0.64	0.00203	UP	RNA-Seq	26793951
8	IMPAD1	prefrontal cortex	-0.28	2.9e-05	DOWN	RNA-Seq	26793951
7	IMPDH1	prefrontal cortex	0.33	0.00177	UP	RNA-Seq	26793951
7	INHBA	skin	1.1	4.35e-08	UP	RNA-Seq	28068941
18	INO80C	skin	-0.72	0.000187	DOWN	RNA-Seq	28068941
2	INPP5D	prefrontal cortex	0.41	0.00191	UP	RNA-Seq	26793951
9	INPP5E	prefrontal cortex	0.24	0.00299	UP	RNA-Seq	26793951
11	INPPL1	prefrontal cortex	0.44	0.000126	UP	RNA-Seq	26793951
11	INS-IGF2	skin	0.64	0.000701	UP	RNA-Seq	28068941
4	INTU	prefrontal cortex	-0.5	0.00195	DOWN	RNA-Seq	26793951
1	IPP	prefrontal cortex	-0.31	0.000819	DOWN	RNA-Seq	26793951
5	IRF1	prefrontal cortex	0.43	0.00282	UP	RNA-Seq	26793951
19	IRF3	prefrontal cortex	0.27	0.000714	UP	RNA-Seq	26793951
11	IRF7	prefrontal cortex	0.63	0.000144	UP	RNA-Seq	26793951
15	ISG20	skin	-0.99	0.00186	DOWN	RNA-Seq	28068941
19	ISYNA1	prefrontal cortex	0.67	2.62e-07	UP	RNA-Seq	26793951
1	ITGA10	prefrontal cortex	0.77	7.03e-06	UP	RNA-Seq	26793951
16	ITGAX	skin	-0.6	0.0013	DOWN	RNA-Seq	28068941
20	ITPA	skin	-0.84	3.98e-06	DOWN	RNA-Seq	28068941
1	ITPKB	prefrontal cortex	0.53	0.000573	UP	RNA-Seq	26793951
1	ITPKB	blood	0.11	0.000199	UP	RNA-seq	28916538
6	ITPR3	prefrontal cortex	0.44	0.000194	UP	RNA-Seq	26793951
14	JDP2	prefrontal cortex	0.56	2.06e-06	UP	RNA-Seq	26793951
1	JMJD4	skin	-0.83	0.000174	DOWN	RNA-Seq	28068941
17	JMJD6	prefrontal cortex	0.66	1.21e-06	UP	RNA-Seq	26793951
19	KANK2	prefrontal cortex	0.47	0.00175	UP	RNA-Seq	26793951
16	KAT8	prefrontal cortex	0.24	0.000468	UP	RNA-Seq	26793951
13	KATNAL1	prefrontal cortex	-0.2	0.00282	DOWN	RNA-Seq	26793951
10	KAZALD1	prefrontal cortex	-0.45	0.00282	DOWN	RNA-Seq	26793951
18	KC6	skin	1.41	0.00166	UP	RNA-Seq	28068941
12	KCNA1	skin	1.12	7.62e-08	UP	RNA-Seq	28068941
21	KCNE1	skin	1.04	7.56e-05	UP	RNA-Seq	28068941
21	KCNE1	skin	1.04	7.56e-05	UP	RNA-Seq	28068941
2	KCNE4	prefrontal cortex	1.31	1.2e-09	UP	RNA-Seq	26793951
1	KCNH1	prefrontal cortex	-0.66	0.00205	DOWN	RNA-Seq	26793951
11	KCNK7	skin	-0.97	1.39e-06	DOWN	RNA-Seq	28068941
6	KCNQ5	skin	0.74	0.00216	UP	RNA-Seq	28068941
5	KCTD16	skin	0.87	0.000635	UP	RNA-Seq	28068941
11	KDM4D	prefrontal cortex	-0.37	0.00235	DOWN	RNA-Seq	26793951
1	KHDRBS1	prefrontal cortex	-0.29	0.000912	DOWN	RNA-Seq	26793951
1	KIAA0319L	blood	0.19	7.36e-06	UP	RNA-seq	28916538
1	KIAA0319L	blood	0.18	2.95e-05	UP	RNA-seq	28916538
3	KIAA1143	prefrontal cortex	-0.25	0.000657	DOWN	RNA-Seq	26793951
10	KIAA1274	skin	-0.67	0.000496	DOWN	RNA-Seq	28068941
7	KIAA1324L	prefrontal cortex	-0.44	0.00247	DOWN	RNA-Seq	26793951
3	KIAA1407	prefrontal cortex	-0.37	0.00191	DOWN	RNA-Seq	26793951
3	KIAA1524	prefrontal cortex	-0.52	0.00151	DOWN	RNA-Seq	26793951
2	KIDINS220	prefrontal cortex	-0.28	0.00198	DOWN	RNA-Seq	26793951
10	KIF5B	blood	-0.12	0.00013	DOWN	RNA-seq	28916538
8	KIFC2	skin	-1.31	8.96e-12	DOWN	RNA-Seq	28068941
19	KIRREL2	prefrontal cortex	-0.51	0.000532	DOWN	RNA-Seq	26793951
19	KLC3	prefrontal cortex	0.79	4.7e-05	UP	RNA-Seq	26793951
3	KLF15	prefrontal cortex	0.63	5.32e-05	UP	RNA-Seq	26793951
19	KLF2	skin	-1	4.63e-06	DOWN	RNA-Seq	28068941
1	KLHDC8A	blood	-0.2	2.25e-05	DOWN	RNA-seq	28916538
3	KLHDC8B	skin	-0.69	0.000703	DOWN	RNA-Seq	28068941
1	KLHL17	prefrontal cortex	0.49	7.89e-05	UP	RNA-Seq	26793951
1	KLHL20	prefrontal cortex	-0.26	0.00084	DOWN	RNA-Seq	26793951
1	KLHL21	prefrontal cortex	0.31	0.00106	UP	RNA-Seq	26793951
X	KLHL4	skin	0.63	0.00198	UP	RNA-Seq	28068941
12	KLHL42	prefrontal cortex	-0.31	0.000657	DOWN	RNA-Seq	26793951
3	KLHL6	prefrontal cortex	0.69	0.000695	UP	RNA-Seq	26793951
19	KLK1	prefrontal cortex	0.91	9.34e-05	UP	RNA-Seq	26793951
19	KLK11	skin	-0.61	0.000419	DOWN	RNA-Seq	28068941
19	KLK14	prefrontal cortex	0.73	1.37e-05	UP	RNA-Seq	26793951
19	KLK8	skin	-0.59	0.000654	DOWN	RNA-Seq	28068941
12	KLRC3	skin	1.99	0.00107	UP	RNA-Seq	28068941
1	KPNA6	blood	0.12	4e-05	UP	RNA-seq	28916538
17	KRT15	skin	-0.85	2.17e-06	DOWN	RNA-Seq	28068941
17	KRT17	skin	-0.9	2.89e-06	DOWN	RNA-Seq	28068941
17	KRT27	skin	-0.81	0.000394	DOWN	RNA-Seq	28068941
17	KRT31	skin	-0.74	0.00146	DOWN	RNA-Seq	28068941
12	KRT4	skin	-1.13	9.49e-06	DOWN	RNA-Seq	28068941
12	KRT71	skin	-0.79	8.41e-05	DOWN	RNA-Seq	28068941
12	KRT74	skin	-0.96	4.75e-05	DOWN	RNA-Seq	28068941
12	KRT79	skin	-1.13	7.56e-08	DOWN	RNA-Seq	28068941
12	KRT85	skin	-0.96	0.000475	DOWN	RNA-Seq	28068941
17	KRT9	skin	0.48	0.001	UP	RNA-Seq	28068941
17	KRTAP1-5	skin	1.15	0.00137	UP	RNA-Seq	28068941
17	KRTAP4-1	skin	1.78	7.35e-05	UP	RNA-Seq	28068941
11	KRTAP5-10	skin	-1.4	0.000763	DOWN	RNA-Seq	28068941
1	KRTCAP2	skin	-0.67	0.000235	DOWN	RNA-Seq	28068941
2	KRTCAP3	skin	-0.72	0.000834	DOWN	RNA-Seq	28068941
19	KRTDAP	skin	-0.83	2.89e-06	DOWN	RNA-Seq	28068941
14	L3HYPDH	prefrontal cortex	-0.37	0.000244	DOWN	RNA-Seq	26793951
3	LAMB2	prefrontal cortex	0.55	0.000137	UP	RNA-Seq	26793951
2	LANCL1	prefrontal cortex	-0.43	0.000838	DOWN	RNA-Seq	26793951
7	LANCL2	prefrontal cortex	-0.2	0.00291	DOWN	RNA-Seq	26793951
16	LAT	prefrontal cortex	0.69	0.000243	UP	RNA-Seq	26793951
7	LAT2	prefrontal cortex	0.55	0.000776	UP	RNA-Seq	26793951
20	LBP	skin	-2.46	0.000269	DOWN	RNA-Seq	28068941
2	LBX2	prefrontal cortex	0.82	0.000526	UP	RNA-Seq	26793951
1	LCE1A	skin	-1.04	3.3e-08	DOWN	RNA-Seq	28068941
1	LCE1B	skin	-1.01	1.51e-08	DOWN	RNA-Seq	28068941
1	LCE1C	skin	-0.95	2.28e-07	DOWN	RNA-Seq	28068941
1	LCE1D	skin	-0.86	4.17e-05	DOWN	RNA-Seq	28068941
1	LCE1E	skin	-0.7	0.000273	DOWN	RNA-Seq	28068941
1	LCE1F	skin	-0.68	0.000162	DOWN	RNA-Seq	28068941
1	LCE2C	skin	-0.68	0.000493	DOWN	RNA-Seq	28068941
1	LCE2D	skin	-1.35	1.58e-12	DOWN	RNA-Seq	28068941
1	LCE3D	skin	-0.91	1.65e-05	DOWN	RNA-Seq	28068941
1	LCE5A	skin	-1.53	2.19e-16	DOWN	RNA-Seq	28068941
9	LCN10	prefrontal cortex	0.97	1.21e-05	UP	RNA-Seq	26793951
9	LCN6	prefrontal cortex	0.77	0.000871	UP	RNA-Seq	26793951
9	LCNL1	prefrontal cortex	0.58	0.00026	UP	RNA-Seq	26793951
18	LDLRAD4	prefrontal cortex	-0.41	0.003	DOWN	RNA-Seq	26793951
3	LEKR1	prefrontal cortex	-0.56	0.00292	DOWN	RNA-Seq	26793951
7	LEP	skin	-0.62	0.00157	DOWN	RNA-Seq	28068941
7	LFNG	skin	-0.74	9.19e-05	DOWN	RNA-Seq	28068941
22	LGALS1	skin	-0.85	7.01e-07	DOWN	RNA-Seq	28068941
11	LGALS12	skin	-0.92	0.00132	DOWN	RNA-Seq	28068941
22	LGALS2	blood	-0.58	3.4e-06	DOWN	RNA-seq	28916538
19	LGALS7	skin	-1.65	4.44e-07	DOWN	RNA-Seq	28068941
19	LGALS7B	skin	-1.95	2e-09	DOWN	RNA-Seq	28068941
17	LHX1	prefrontal cortex	-1.07	3.04e-06	DOWN	RNA-Seq	26793951
19	LILRA2	skin	-1.73	1.43e-06	DOWN	RNA-Seq	28068941
19	LILRA2	skin	-1.73	1.43e-06	DOWN	RNA-Seq	28068941
19	LILRA2	skin	-1.73	1.43e-06	DOWN	RNA-Seq	28068941
20	LIME1	prefrontal cortex	0.48	0.0022	UP	RNA-Seq	26793951
4	LIN54	prefrontal cortex	-0.32	0.000826	DOWN	RNA-Seq	26793951
19	LIN7B	skin	-0.77	0.000437	DOWN	RNA-Seq	28068941
2	LINC01119	prefrontal cortex	-0.49	0.000966	DOWN	RNA-Seq	26793951
9	LINGO2	skin	1.04	1.43e-05	UP	RNA-Seq	28068941
1	LINGO4	prefrontal cortex	-0.73	0.00182	DOWN	RNA-Seq	26793951
2	LMAN2L	prefrontal cortex	0.29	0.000537	UP	RNA-Seq	26793951
22	LMF2	blood	0.1	3.97e-06	UP	RNA-seq	28916538
3	LMOD3	skin	0.91	0.000284	UP	RNA-Seq	28068941
-	LOC100125556	skin	-0.78	0.0021	DOWN	RNA-Seq	28068941
-	LOC100128822	skin	-0.62	0.00221	DOWN	RNA-Seq	28068941
-	LOC100131801	skin	-0.82	0.000168	DOWN	RNA-Seq	28068941
-	LOC100233209	skin	0.9	0.000142	UP	RNA-Seq	28068941
-	LOC100271831	skin	-0.84	8.95e-05	DOWN	RNA-Seq	28068941
19	LOC100379224	skin	-0.61	0.00186	DOWN	RNA-Seq	28068941
2	LOC100499194	skin	0.9	0.00121	UP	RNA-Seq	28068941
-	LOC100507463	skin	-0.74	3.01e-05	DOWN	RNA-Seq	28068941
-	LOC121952	skin	0.76	0.000127	UP	RNA-Seq	28068941
-	LOC145820	skin	0.88	0.000131	UP	RNA-Seq	28068941
1	LOC148413	skin	-0.6	0.0021	DOWN	RNA-Seq	28068941
-	LOC152217	skin	-0.84	4.79e-06	DOWN	RNA-Seq	28068941
19	LOC284454	skin	-0.6	0.000491	DOWN	RNA-Seq	28068941
-	LOC340318	blood	0.15	1.06e-05	UP	RNA-seq	28916538
-	LOC388789	skin	-0.95	1.77e-07	DOWN	RNA-Seq	28068941
-	LOC402778	skin	-0.89	0.000156	DOWN	RNA-Seq	28068941
-	LOC440600	skin	1.14	0.000145	UP	RNA-Seq	28068941
7	LOC641746	skin	-1.94	0.000266	DOWN	RNA-Seq	28068941
-	LOC642587	skin	-0.96	6.85e-08	DOWN	RNA-Seq	28068941
-	LOC643008	skin	-0.73	0.000404	DOWN	RNA-Seq	28068941
-	LOC645638	skin	-1.08	9.28e-09	DOWN	RNA-Seq	28068941
-	LOC650368	skin	-1.15	0.000608	DOWN	RNA-Seq	28068941
17	LOC728392	skin	-0.79	0.000132	DOWN	RNA-Seq	28068941
1	LOC728989	skin	1.88	0.00184	UP	RNA-Seq	28068941
-	LOC731779	skin	1.65	3.07e-05	UP	RNA-Seq	28068941
4	LOC93622	skin	-0.67	0.000114	DOWN	RNA-Seq	28068941
1	LOR	skin	-0.8	2.4e-05	DOWN	RNA-Seq	28068941
19	LPAR2	prefrontal cortex	0.4	0.00129	UP	RNA-Seq	26793951
1	LPGAT1	prefrontal cortex	-0.33	0.00201	DOWN	RNA-Seq	26793951
7	LRCH4	prefrontal cortex	0.38	0.00112	UP	RNA-Seq	26793951
2	LRPPRC	prefrontal cortex	-0.26	0.00064	DOWN	RNA-Seq	26793951
11	LRRC10B	skin	-1.81	0.000986	DOWN	RNA-Seq	28068941
7	LRRC17	prefrontal cortex	-0.35	0.00172	DOWN	RNA-Seq	26793951
1	LRRC39	prefrontal cortex	-0.37	0.00015	DOWN	RNA-Seq	26793951
21	LRRC3DN	prefrontal cortex	0.59	0.00159	UP	RNA-Seq	26793951
1	LRRC40	prefrontal cortex	-0.34	0.00287	DOWN	RNA-Seq	26793951
15	LRRC49	prefrontal cortex	-0.33	0.000841	DOWN	RNA-Seq	26793951
16	LRRC50	skin	1.24	0.00195	UP	RNA-Seq	28068941
1	LRRC8B	prefrontal cortex	-0.37	0.00202	DOWN	RNA-Seq	26793951
3	LRTM1	skin	1.17	0.00198	UP	RNA-Seq	28068941
19	LSM4	skin	-0.61	0.0013	DOWN	RNA-Seq	28068941
7	LSMEM1	prefrontal cortex	0.81	7.85e-07	UP	RNA-Seq	26793951
11	LSP1	blood	0.11	0.000126	UP	RNA-seq	28916538
21	LSS	skin	-0.66	0.000185	DOWN	RNA-Seq	28068941
14	LTB4R2	skin	-0.72	0.000622	DOWN	RNA-Seq	28068941
21	LTN1	prefrontal cortex	-0.35	0.00157	DOWN	RNA-Seq	26793951
12	LUM	skin	0.57	0.000657	UP	RNA-Seq	28068941
8	LY6D	skin	-0.58	0.000778	DOWN	RNA-Seq	28068941
8	LY6K	skin	-0.83	0.000173	DOWN	RNA-Seq	28068941
8	LY6K	skin	-0.83	0.000173	DOWN	RNA-Seq	28068941
2	LYPD6B	skin	-0.72	6.77e-05	DOWN	RNA-Seq	28068941
6	LYRM2	prefrontal cortex	-0.28	0.000736	DOWN	RNA-Seq	26793951
5	LYRM7	prefrontal cortex	-0.26	0.000187	DOWN	RNA-Seq	26793951
10	LZTS2	skin	-0.67	0.000208	DOWN	RNA-Seq	28068941
11	MACROD1	prefrontal cortex	0.45	4.88e-05	UP	RNA-Seq	26793951
22	MAFF	prefrontal cortex	0.96	8.58e-07	UP	RNA-Seq	26793951
8	MAK16	prefrontal cortex	-0.3	7.47e-05	DOWN	RNA-Seq	26793951
3	MANF	prefrontal cortex	0.36	0.00167	UP	RNA-Seq	26793951
3	MANF	skin	-0.73	0.00012	DOWN	RNA-Seq	28068941
3	MANF	skin	-0.73	0.00012	DOWN	RNA-Seq	28068941
20	MAP1LC3A	skin	-0.9	0.000281	DOWN	RNA-Seq	28068941
1	MAP1LC3C	prefrontal cortex	0.73	0.00117	UP	RNA-Seq	26793951
17	MAP2K3	prefrontal cortex	0.37	0.00064	UP	RNA-Seq	26793951
1	MAPKAPK2	prefrontal cortex	0.39	0.000932	UP	RNA-Seq	26793951
12	MAPKAPK5	prefrontal cortex	-0.23	0.00075	DOWN	RNA-Seq	26793951
18	MAPRE2	prefrontal cortex	-0.26	0.000314	DOWN	RNA-Seq	26793951
2	MARCO	skin	-1.1	1.25e-07	DOWN	RNA-Seq	28068941
6	MAS1	prefrontal cortex	-0.91	0.000134	DOWN	RNA-Seq	26793951
14	MAX	prefrontal cortex	0.23	0.00224	UP	RNA-Seq	26793951
6	MB21D1	prefrontal cortex	0.46	0.0027	UP	RNA-Seq	26793951
X	MBTPS2	prefrontal cortex	-0.38	0.000294	DOWN	RNA-Seq	26793951
2	MCEE	prefrontal cortex	-0.28	0.00154	DOWN	RNA-Seq	26793951
14	MDP1	skin	-0.88	4.06e-06	DOWN	RNA-Seq	28068941
18	ME2	prefrontal cortex	-0.29	6.43e-05	DOWN	RNA-Seq	26793951
5	MED10	skin	-0.62	0.000588	DOWN	RNA-Seq	28068941
X	MED14	prefrontal cortex	-0.42	3.04e-07	DOWN	RNA-Seq	26793951
19	MED26	prefrontal cortex	0.21	0.00299	UP	RNA-Seq	26793951
19	MED29	prefrontal cortex	-0.24	0.000363	DOWN	RNA-Seq	26793951
19	MEF2B	prefrontal cortex	0.79	6.8e-05	UP	RNA-Seq	26793951
7	MEPCE	prefrontal cortex	0.25	0.00267	UP	RNA-Seq	26793951
17	METRNL	prefrontal cortex	0.54	7.63e-05	UP	RNA-Seq	26793951
17	METTL2A	prefrontal cortex	-0.23	0.0031	DOWN	RNA-Seq	26793951
12	METTL7A	skin	-0.64	0.000367	DOWN	RNA-Seq	28068941
12	METTL7B	prefrontal cortex	0.66	6.57e-05	UP	RNA-Seq	26793951
1	MEX3A	prefrontal cortex	0.53	0.000481	UP	RNA-Seq	26793951
3	MFN1	prefrontal cortex	-0.3	0.000321	DOWN	RNA-Seq	26793951
8	MFSD3	skin	-0.97	0.000239	DOWN	RNA-Seq	28068941
12	MFSD5	skin	-0.57	0.00176	DOWN	RNA-Seq	28068941
4	MFSD7	skin	-1	0.00137	DOWN	RNA-Seq	28068941
4	MFSD8	prefrontal cortex	-0.31	0.00204	DOWN	RNA-Seq	26793951
5	MGAT1	prefrontal cortex	0.3	4.8e-05	UP	RNA-Seq	26793951
5	MGAT1	skin	-0.56	0.00178	DOWN	RNA-Seq	28068941
12	MGP	skin	-0.7	8.57e-05	DOWN	RNA-Seq	28068941
19	MIA	prefrontal cortex	1.06	7.79e-06	UP	RNA-Seq	26793951
6	MICB	prefrontal cortex	0.66	0.000102	UP	RNA-Seq	26793951
X	MID1IP1	blood	0.12	0.000257	UP	RNA-seq	28916538
19	MIER2	prefrontal cortex	0.26	0.00131	UP	RNA-Seq	26793951
22	MIF	skin	-0.94	2.46e-06	DOWN	RNA-Seq	28068941
2	MIR1244-1	skin	-0.9	1.29e-06	DOWN	RNA-Seq	28068941
5	MIR1244-2	skin	-0.9	1.29e-06	DOWN	RNA-Seq	28068941
12	MIR1244-3	skin	-0.9	1.29e-06	DOWN	RNA-Seq	28068941
15	MIR1282	skin	-0.68	0.000549	DOWN	RNA-Seq	28068941
15	MIR147B	skin	-1.23	7.46e-06	DOWN	RNA-Seq	28068941
1	MIR205	skin	-0.71	0.00206	DOWN	RNA-Seq	28068941
19	MKNK2	prefrontal cortex	0.67	2.8e-05	UP	RNA-Seq	26793951
16	MLKL	prefrontal cortex	0.9	2.49e-06	UP	RNA-Seq	26793951
-	MLL2	blood	0.15	1.99e-05	UP	RNA-seq	28916538
2	MLPH	prefrontal cortex	0.98	1.64e-05	UP	RNA-Seq	26793951
7	MLXIPL	skin	-0.75	0.00208	DOWN	RNA-Seq	28068941
7	MLXIPL	skin	-0.75	0.00208	DOWN	RNA-Seq	28068941
1	MMACHC	prefrontal cortex	-0.45	5.32e-05	DOWN	RNA-Seq	26793951
8	MMP16	skin	0.63	0.00173	UP	RNA-Seq	28068941
1	MMP23B	prefrontal cortex	0.86	3.6e-05	UP	RNA-Seq	26793951
11	MMP3	prefrontal cortex	-0.9	0.00015	DOWN	RNA-Seq	26793951
11	MMP3	skin	-1.36	0.000246	DOWN	RNA-Seq	28068941
11	MMP3	skin	-1.36	0.000246	DOWN	RNA-Seq	28068941
20	MMP9	prefrontal cortex	1.16	9.36e-07	UP	RNA-Seq	26793951
17	MNT	blood	0.12	7.02e-05	UP	RNA-seq	28916538
2	MOB1A	blood	-0.1	0.000177	DOWN	RNA-seq	28916538
11	MOB2	prefrontal cortex	0.33	0.00107	UP	RNA-Seq	26793951
19	MOB3A	prefrontal cortex	0.31	0.0014	UP	RNA-Seq	26793951
11	MOGAT2	skin	-1.59	2.22e-06	DOWN	RNA-Seq	28068941
2	MPP4	skin	1.06	0.00135	UP	RNA-Seq	28068941
22	MPST	skin	-1.12	1.6e-07	DOWN	RNA-Seq	28068941
16	MPV17L	prefrontal cortex	-0.55	1.53e-05	DOWN	RNA-Seq	26793951
1	MPZ	prefrontal cortex	0.41	0.000233	UP	RNA-Seq	26793951
3	MRAS	prefrontal cortex	0.45	0.00023	UP	RNA-Seq	26793951
10	MRC1L1	prefrontal cortex	0.72	0.00181	UP	RNA-Seq	26793951
8	MROH6	prefrontal cortex	0.6	0.000556	UP	RNA-Seq	26793951
6	MRPL14	skin	-1.04	8.08e-09	DOWN	RNA-Seq	28068941
8	MRPL15	skin	-0.7	8.65e-05	DOWN	RNA-Seq	28068941
11	MRPL23	skin	-1.04	7.56e-05	DOWN	RNA-Seq	28068941
17	MRPL27	skin	-0.6	0.00164	DOWN	RNA-Seq	28068941
7	MRPL32	prefrontal cortex	-0.3	0.00015	DOWN	RNA-Seq	26793951
2	MRPL33	skin	-0.84	3.21e-06	DOWN	RNA-Seq	28068941
17	MRPL38	prefrontal cortex	0.3	0.0026	UP	RNA-Seq	26793951
9	MRPL41	skin	-0.97	6.79e-06	DOWN	RNA-Seq	28068941
14	MRPL52	skin	-1.05	2.08e-08	DOWN	RNA-Seq	28068941
19	MRPL54	skin	-0.91	2.92e-05	DOWN	RNA-Seq	28068941
1	MRPL55	skin	-0.99	1.09e-05	DOWN	RNA-Seq	28068941
19	MRPS12	skin	-0.69	0.000954	DOWN	RNA-Seq	28068941
10	MRPS16	prefrontal cortex	-0.26	0.00105	DOWN	RNA-Seq	26793951
7	MRPS17	skin	-0.75	0.000459	DOWN	RNA-Seq	28068941
7	MRPS24	skin	-0.58	0.00212	DOWN	RNA-Seq	28068941
21	MRPS6	prefrontal cortex	0.77	4.53e-07	UP	RNA-Seq	26793951
11	MS4A4A	skin	-0.59	0.00097	DOWN	RNA-Seq	28068941
11	MS4A6A	prefrontal cortex	0.7	0.0012	UP	RNA-Seq	26793951
2	MSH2	prefrontal cortex	-0.31	9.66e-06	DOWN	RNA-Seq	26793951
10	MSMB	skin	-1	6.34e-06	DOWN	RNA-Seq	28068941
10	MSMB	skin	-1	6.34e-06	DOWN	RNA-Seq	28068941
1	MST1P2	skin	-0.78	0.00203	DOWN	RNA-Seq	28068941
1	MSTO1	prefrontal cortex	-0.27	0.0028	DOWN	RNA-Seq	26793951
4	MSX1	prefrontal cortex	0.6	0.000388	UP	RNA-Seq	26793951
16	MT1A	prefrontal cortex	0.7	0.00203	UP	RNA-Seq	26793951
16	MT1E	prefrontal cortex	0.58	0.000794	UP	RNA-Seq	26793951
16	MT1F	prefrontal cortex	0.82	9.25e-06	UP	RNA-Seq	26793951
16	MT1G	prefrontal cortex	0.68	0.000664	UP	RNA-Seq	26793951
16	MT1G	skin	-1.19	2.77e-06	DOWN	RNA-Seq	28068941
16	MT1L	skin	-1.9	0.000254	DOWN	RNA-Seq	28068941
16	MT1M	prefrontal cortex	0.71	0.000146	UP	RNA-Seq	26793951
16	MT1M	skin	-1.38	0.000828	DOWN	RNA-Seq	28068941
16	MT1X	prefrontal cortex	0.57	0.00287	UP	RNA-Seq	26793951
16	MT1X	skin	-1.12	1.95e-10	DOWN	RNA-Seq	28068941
16	MT2A	prefrontal cortex	0.69	7.64e-05	UP	RNA-Seq	26793951
16	MT2A	skin	-1.09	3.94e-08	DOWN	RNA-Seq	28068941
16	MT4	skin	-2.66	5.66e-08	DOWN	RNA-Seq	28068941
8	MTBP	prefrontal cortex	-0.5	9.49e-05	DOWN	RNA-Seq	26793951
6	MTCH1	skin	-0.61	0.000501	DOWN	RNA-Seq	28068941
11	MTCH2	prefrontal cortex	-0.29	0.000141	DOWN	RNA-Seq	26793951
3	MTMR14	blood	0.08	0.000269	UP	RNA-seq	28916538
8	MTMR7	prefrontal cortex	-0.37	0.00169	DOWN	RNA-Seq	26793951
8	MTMR9	prefrontal cortex	-0.26	0.00206	DOWN	RNA-Seq	26793951
-	MT-ND6	prefrontal cortex	0.64	0.00134	UP	RNA-Seq	26793951
10	MTPAP	prefrontal cortex	-0.17	0.00251	DOWN	RNA-Seq	26793951
1	MTR	prefrontal cortex	-0.42	3.55e-05	DOWN	RNA-Seq	26793951
16	MTSS1L	prefrontal cortex	0.41	0.00143	UP	RNA-Seq	26793951
5	MTX3	prefrontal cortex	-0.61	0.00252	DOWN	RNA-Seq	26793951
1	MUC1	skin	-0.87	0.000826	DOWN	RNA-Seq	28068941
19	MUC16	skin	0.89	1.15e-06	UP	RNA-Seq	28068941
3	MUSTN1	skin	-1.11	1.13e-06	DOWN	RNA-Seq	28068941
16	MVD	skin	-0.75	0.000948	DOWN	RNA-Seq	28068941
12	MVK	skin	-0.72	0.000992	DOWN	RNA-Seq	28068941
12	MVK	skin	-0.72	0.000992	DOWN	RNA-Seq	28068941
X	MXRA5	skin	0.66	6.66e-05	UP	RNA-Seq	28068941
15	MYEF2	prefrontal cortex	-0.28	0.000812	DOWN	RNA-Seq	26793951
2	MYEOV2	skin	-0.53	0.00211	DOWN	RNA-Seq	28068941
12	MYL6	skin	-0.71	5.34e-05	DOWN	RNA-Seq	28068941
20	MYLK2	prefrontal cortex	-0.69	8.15e-05	DOWN	RNA-Seq	26793951
19	MYO1F	prefrontal cortex	0.52	0.000886	UP	RNA-Seq	26793951
5	MYOT	skin	0.91	0.000377	UP	RNA-Seq	28068941
5	MYOT	skin	0.91	0.000377	UP	RNA-Seq	28068941
1	MYSM1	prefrontal cortex	-0.36	0.000839	DOWN	RNA-Seq	26793951
5	MZB1	prefrontal cortex	0.78	0.000589	UP	RNA-Seq	26793951
2	MZT2B	skin	-0.87	0.000693	DOWN	RNA-Seq	28068941
X	NAA10	skin	-0.78	6.61e-05	DOWN	RNA-Seq	28068941
12	NAA25	prefrontal cortex	-0.41	0.000687	DOWN	RNA-Seq	26793951
9	NAA35	prefrontal cortex	-0.22	0.0019	DOWN	RNA-Seq	26793951
9	NACC2	prefrontal cortex	0.36	0.00198	UP	RNA-Seq	26793951
1	NADK	prefrontal cortex	0.26	5.31e-06	UP	RNA-Seq	26793951
4	NAF1	prefrontal cortex	-0.36	0.000586	DOWN	RNA-Seq	26793951
17	NAGLU	skin	-0.63	0.000441	DOWN	RNA-Seq	28068941
17	NAGS	prefrontal cortex	0.56	0.000458	UP	RNA-Seq	26793951
13	NALCN	prefrontal cortex	-0.29	0.00119	DOWN	RNA-Seq	26793951
19	NANOS2	prefrontal cortex	1.29	5.94e-08	UP	RNA-Seq	26793951
19	NAPSA	prefrontal cortex	0.53	0.000885	UP	RNA-Seq	26793951
-	NAT6	skin	-0.69	0.00187	DOWN	RNA-Seq	28068941
-	NAT6	skin	-0.69	0.00187	DOWN	RNA-Seq	28068941
12	NAV3	prefrontal cortex	-0.25	0.000983	DOWN	RNA-Seq	26793951
7	NCAPG2	peripheral blood	0.97	3.64e-13	UP	RNA-seq	25475535
7	NCF1	prefrontal cortex	0.58	0.00202	UP	RNA-Seq	26793951
22	NCF4	prefrontal cortex	0.54	0.00297	UP	RNA-Seq	26793951
11	NCR3LG1	prefrontal cortex	-0.72	0.000686	DOWN	RNA-Seq	26793951
4	NCRNA00099	skin	0.93	0.00206	UP	RNA-Seq	28068941
2	NCRNA00116	skin	-0.94	0.00147	DOWN	RNA-Seq	28068941
15	NCRNA00277	skin	1.48	0.000138	UP	RNA-Seq	28068941
X	NDUFA1	skin	-0.64	0.000287	DOWN	RNA-Seq	28068941
19	NDUFA11	skin	-0.78	4.72e-05	DOWN	RNA-Seq	28068941
19	NDUFA13	skin	-0.72	0.000141	DOWN	RNA-Seq	28068941
5	NDUFA2	skin	-0.74	5.26e-05	DOWN	RNA-Seq	28068941
7	NDUFA4	skin	-0.7	6.68e-05	DOWN	RNA-Seq	28068941
19	NDUFA7	skin	-0.83	1.02e-05	DOWN	RNA-Seq	28068941
9	NDUFA8	skin	-0.63	0.000711	DOWN	RNA-Seq	28068941
16	NDUFAB1	skin	-0.58	0.00102	DOWN	RNA-Seq	28068941
14	NDUFB1	skin	-0.81	1.35e-05	DOWN	RNA-Seq	28068941
16	NDUFB10	skin	-0.63	0.000257	DOWN	RNA-Seq	28068941
X	NDUFB11	skin	-0.83	8.84e-06	DOWN	RNA-Seq	28068941
7	NDUFB2	skin	-0.68	9.46e-05	DOWN	RNA-Seq	28068941
4	NDUFC1	skin	-0.82	1.32e-06	DOWN	RNA-Seq	28068941
11	NDUFC2	skin	-0.58	0.00118	DOWN	RNA-Seq	28068941
2	NDUFS1	prefrontal cortex	-0.35	0.000286	DOWN	RNA-Seq	26793951
1	NDUFS5	skin	-0.95	2.71e-07	DOWN	RNA-Seq	28068941
5	NDUFS6	skin	-0.89	1.22e-06	DOWN	RNA-Seq	28068941
19	NDUFS7	skin	-1.34	8.39e-06	DOWN	RNA-Seq	28068941
11	NDUFV1	skin	-0.57	0.00148	DOWN	RNA-Seq	28068941
14	NEDD8	skin	-0.66	0.000228	DOWN	RNA-Seq	28068941
8	NEIL2	skin	-0.6	0.00165	DOWN	RNA-Seq	28068941
18	NETO1	skin	0.76	0.00142	UP	RNA-Seq	28068941
17	NF1	prefrontal cortex	-0.26	0.000283	DOWN	RNA-Seq	26793951
14	NFATC4	prefrontal cortex	0.5	0.000486	UP	RNA-Seq	26793951
9	NFIL3	prefrontal cortex	0.58	5.87e-05	UP	RNA-Seq	26793951
10	NFKB2	prefrontal cortex	0.71	9.95e-06	UP	RNA-Seq	26793951
14	NFKBIA	prefrontal cortex	0.53	7.96e-05	UP	RNA-Seq	26793951
1	NFYC	blood	0.11	6.96e-05	UP	RNA-seq	28916538
6	NHEG1	skin	0.91	0.00026	UP	RNA-Seq	28068941
1	NHLH1	prefrontal cortex	0.52	0.00041	UP	RNA-Seq	26793951
13	NHLRC3	prefrontal cortex	-0.39	0.000341	DOWN	RNA-Seq	26793951
5	NHP2	skin	-0.64	0.00137	DOWN	RNA-Seq	28068941
22	NHP2L1	skin	-0.53	0.00212	DOWN	RNA-Seq	28068941
6	NKAIN2	skin	0.74	0.000754	UP	RNA-Seq	28068941
6	NKAPL	skin	0.8	0.000911	UP	RNA-Seq	28068941
11	NLRP6	prefrontal cortex	0.73	0.00218	UP	RNA-Seq	26793951
15	NMB	skin	-0.59	0.00222	DOWN	RNA-Seq	28068941
17	NME1	skin	-0.83	8.15e-06	DOWN	RNA-Seq	28068941
17	NME1-NME2	skin	-0.71	6.77e-05	DOWN	RNA-Seq	28068941
17	NME2	skin	-0.71	6.77e-05	DOWN	RNA-Seq	28068941
16	NME3	skin	-0.86	0.0001	DOWN	RNA-Seq	28068941
5	NME5	skin	1.06	0.00031	UP	RNA-Seq	28068941
4	NMU	skin	-1.17	1.47e-10	DOWN	RNA-Seq	28068941
12	NOC4L	blood	0.14	0.00023	UP	RNA-seq	28916538
15	NOP10	skin	-1.04	9.37e-09	DOWN	RNA-Seq	28068941
12	NOP2	prefrontal cortex	0.33	0.00099	UP	RNA-Seq	26793951
7	NOS3	prefrontal cortex	0.62	0.000853	UP	RNA-Seq	26793951
19	NOSIP	skin	-1.25	1.42e-06	DOWN	RNA-Seq	28068941
11	NPAT	prefrontal cortex	-0.25	0.00302	DOWN	RNA-Seq	26793951
7	NPC1L1	prefrontal cortex	1.14	1.2e-06	UP	RNA-Seq	26793951
14	NPC2	blood	0.12	4.31e-05	UP	RNA-seq	28916538
20	NPEPL1	skin	-0.69	0.000192	DOWN	RNA-Seq	28068941
12	NPFF	prefrontal cortex	0.58	0.000284	UP	RNA-Seq	26793951
12	NPFF	skin	-0.88	5.18e-05	DOWN	RNA-Seq	28068941
16	NPIPB7	prefrontal cortex	0.7	0.000611	UP	RNA-Seq	26793951
11	NR1H3	prefrontal cortex	0.26	0.00185	UP	RNA-Seq	26793951
11	NR1H3	skin	-0.71	0.000321	DOWN	RNA-Seq	28068941
3	NR2C2	prefrontal cortex	-0.41	0.00035	DOWN	RNA-Seq	26793951
8	NRG1	skin	0.61	0.00105	UP	RNA-Seq	28068941
X	NRK	prefrontal cortex	-0.99	2.77e-05	DOWN	RNA-Seq	26793951
2	NRXN1	skin	0.82	5.02e-05	UP	RNA-Seq	28068941
3	NSUN3	prefrontal cortex	-0.42	1.3e-05	DOWN	RNA-Seq	26793951
17	NT5C	skin	-0.84	0.000475	DOWN	RNA-Seq	28068941
3	NT5DC2	skin	-0.74	9.04e-05	DOWN	RNA-Seq	28068941
16	NUBP2	skin	-1.1	5.01e-07	DOWN	RNA-Seq	28068941
1	NUCKS1	prefrontal cortex	-0.25	0.00135	DOWN	RNA-Seq	26793951
14	NUDT14	skin	-0.72	0.00221	DOWN	RNA-Seq	28068941
16	NUDT16L1	skin	-0.74	0.000188	DOWN	RNA-Seq	28068941
11	NUDT8	skin	-1.62	9.62e-09	DOWN	RNA-Seq	28068941
1	NUP133	prefrontal cortex	-0.23	0.00288	DOWN	RNA-Seq	26793951
5	NUP155	prefrontal cortex	-0.25	0.00149	DOWN	RNA-Seq	26793951
1	NUP210L	prefrontal cortex	0.75	5.97e-05	UP	RNA-Seq	26793951
1	NUP210L	skin	0.92	0.00111	UP	RNA-Seq	28068941
16	NUPR1	prefrontal cortex	0.82	1.59e-05	UP	RNA-Seq	26793951
10	NUTM2A	prefrontal cortex	-0.75	4.48e-05	DOWN	RNA-Seq	26793951
17	NXN	prefrontal cortex	0.42	0.00119	UP	RNA-Seq	26793951
19	OAZ1	skin	-0.63	0.000423	DOWN	RNA-Seq	28068941
9	OBP2B	skin	-1.34	8.71e-05	DOWN	RNA-Seq	28068941
9	OBP2B	skin	-1.34	8.71e-05	DOWN	RNA-Seq	28068941
4	OCIAD2	skin	-0.71	8.53e-05	DOWN	RNA-Seq	28068941
16	OGFOD1	prefrontal cortex	-0.16	0.00142	DOWN	RNA-Seq	26793951
9	OGN	skin	0.78	4.78e-06	UP	RNA-Seq	28068941
10	OIT3	prefrontal cortex	0.78	0.00116	UP	RNA-Seq	26793951
6	OLIG3	skin	-1.9	0.000455	DOWN	RNA-Seq	28068941
6	OOEP	skin	-2.21	0.000109	DOWN	RNA-Seq	28068941
3	OPA1	prefrontal cortex	-0.28	0.00101	DOWN	RNA-Seq	26793951
11	OR10A6	skin	-1.53	0.000669	DOWN	RNA-Seq	28068941
9	OR1J4	skin	1.91	0.00163	UP	RNA-Seq	28068941
6	OR2H2	prefrontal cortex	0.67	0.000324	UP	RNA-Seq	26793951
6	OR2H2	skin	-3.6	0.000393	DOWN	RNA-Seq	28068941
6	OR2H2	skin	-3.6	0.000393	DOWN	RNA-Seq	28068941
6	OR2H2	skin	-3.6	0.000393	DOWN	RNA-Seq	28068941
6	OR2H2	skin	-3.6	0.000393	DOWN	RNA-Seq	28068941
6	OR2H2	skin	-3.6	0.000393	DOWN	RNA-Seq	28068941
6	OR2H2	skin	-3.6	0.000393	DOWN	RNA-Seq	28068941
6	OR2H2	skin	-3.6	0.000393	DOWN	RNA-Seq	28068941
19	OR7A5	prefrontal cortex	0.88	0.000172	UP	RNA-Seq	26793951
19	OR7C1	prefrontal cortex	0.79	0.000722	UP	RNA-Seq	26793951
12	ORAI1	skin	-0.69	0.000199	DOWN	RNA-Seq	28068941
12	ORAI1	skin	-0.69	0.000199	DOWN	RNA-Seq	28068941
6	ORC3	prefrontal cortex	-0.21	0.00214	DOWN	RNA-Seq	26793951
16	ORC6	skin	-0.85	0.000693	DOWN	RNA-Seq	28068941
1	OSBPL9	prefrontal cortex	-0.34	0.000609	DOWN	RNA-Seq	26793951
14	OSGEP	skin	-0.61	0.000634	DOWN	RNA-Seq	28068941
3	OSTN	prefrontal cortex	-0.65	0.00101	DOWN	RNA-Seq	26793951
2	OTOS	prefrontal cortex	0.9	5.79e-06	UP	RNA-Seq	26793951
11	OTUB1	skin	-0.63	0.000443	DOWN	RNA-Seq	28068941
10	OTUD1	blood	0.16	0.000233	UP	RNA-seq	28916538
17	OVCA2	skin	-0.56	0.00173	DOWN	RNA-Seq	28068941
13	OXGR1	skin	0.68	0.000947	UP	RNA-Seq	28068941
19	P2RY11	prefrontal cortex	0.3	0.00253	UP	RNA-Seq	26793951
10	P4HA1	prefrontal cortex	0.53	0.000678	UP	RNA-Seq	26793951
5	P4HA2	prefrontal cortex	0.7	1.82e-08	UP	RNA-Seq	26793951
2	PABPC1P2	skin	-1.81	4.44e-11	DOWN	RNA-Seq	28068941
14	PABPN1	blood	0.19	0.000117	UP	RNA-seq	28916538
11	PACS1	blood	0.51	6.6e-05	UP	RNA-seq	28916538
X	PAK3	prefrontal cortex	-0.65	0.000974	DOWN	RNA-Seq	26793951
10	PALD1	prefrontal cortex	0.37	0.000543	UP	RNA-Seq	26793951
19	PALM3	prefrontal cortex	0.5	0.000839	UP	RNA-Seq	26793951
16	PAM16	skin	-0.78	0.00032	DOWN	RNA-Seq	28068941
10	PAOX	skin	-0.86	0.00199	DOWN	RNA-Seq	28068941
5	PAPD4	prefrontal cortex	-0.29	0.00288	DOWN	RNA-Seq	26793951
16	PAQR4	skin	-0.84	0.000486	DOWN	RNA-Seq	28068941
1	PAQR6	skin	-0.6	0.00156	DOWN	RNA-Seq	28068941
10	PARD3	prefrontal cortex	0.54	0.000685	UP	RNA-Seq	26793951
18	PARD6G	prefrontal cortex	0.5	0.000435	UP	RNA-Seq	26793951
22	PARVG	prefrontal cortex	0.68	6.6e-05	UP	RNA-Seq	26793951
22	PARVG	blood	0.1	0.000235	UP	RNA-seq	28916538
2	PAX3	prefrontal cortex	-0.81	0.000403	DOWN	RNA-Seq	26793951
10	PCBD1	prefrontal cortex	0.34	0.00131	UP	RNA-Seq	26793951
3	PCCB	prefrontal cortex	-0.29	0.00305	DOWN	RNA-Seq	26793951
13	PCDH9	skin	0.77	7.69e-05	UP	RNA-Seq	28068941
2	PCGF1	prefrontal cortex	0.23	0.00299	UP	RNA-Seq	26793951
7	PCOLCE	prefrontal cortex	0.65	0.000281	UP	RNA-Seq	26793951
17	PCTP	prefrontal cortex	0.26	0.00239	UP	RNA-Seq	26793951
5	PCYOX1L	prefrontal cortex	-0.4	0.00122	DOWN	RNA-Seq	26793951
10	PDCD4	blood	0.2	5.12e-05	UP	RNA-seq	28916538
11	PDDC1	skin	-0.68	0.00054	DOWN	RNA-Seq	28068941
6	PDE10A	prefrontal cortex	-0.68	0.000264	DOWN	RNA-Seq	26793951
2	PDE11A	prefrontal cortex	-0.63	0.00153	DOWN	RNA-Seq	26793951
8	PDE7A	prefrontal cortex	-0.3	0.00214	DOWN	RNA-Seq	26793951
5	PDGFRB	prefrontal cortex	0.46	0.00154	UP	RNA-Seq	26793951
8	PDGFRL	prefrontal cortex	0.43	0.00198	UP	RNA-Seq	26793951
8	PDLIM2	skin	-0.75	2.11e-05	DOWN	RNA-Seq	28068941
5	PDLIM7	blood	0.16	0.000267	UP	RNA-seq	28916538
10	PDZD7	skin	-0.82	0.000198	DOWN	RNA-Seq	28068941
1	PDZK1IP1	skin	-0.61	0.00143	DOWN	RNA-Seq	28068941
1	PEAR1	prefrontal cortex	0.7	1.76e-05	UP	RNA-Seq	26793951
2	PECR	prefrontal cortex	-0.29	0.00155	DOWN	RNA-Seq	26793951
7	PEG10	skin	0.62	0.00191	UP	RNA-Seq	28068941
19	PEG3	skin	0.65	0.000219	UP	RNA-Seq	28068941
19	PEG3-AS1	skin	0.74	0.000153	UP	RNA-Seq	28068941
8	PENK	prefrontal cortex	-1.03	1.5e-05	DOWN	RNA-Seq	26793951
11	PEX16	skin	-0.91	0.000139	DOWN	RNA-Seq	28068941
1	PFDN2	skin	-0.83	1.33e-05	DOWN	RNA-Seq	28068941
12	PFDN5	skin	-0.91	5.76e-08	DOWN	RNA-Seq	28068941
6	PHF1	prefrontal cortex	0.27	0.000654	UP	RNA-Seq	26793951
4	PHF17	blood	0.15	0.000119	UP	RNA-seq	28916538
11	PHF21A	prefrontal cortex	0.29	0.00114	UP	RNA-Seq	26793951
3	PHF7	prefrontal cortex	-0.46	0.000486	DOWN	RNA-Seq	26793951
16	PHKB	prefrontal cortex	-0.23	0.000672	DOWN	RNA-Seq	26793951
6	PI16	skin	0.66	9.9e-05	UP	RNA-Seq	28068941
21	PIGP	prefrontal cortex	-0.24	0.00297	DOWN	RNA-Seq	26793951
1	PIGR	skin	1	0.000231	UP	RNA-Seq	28068941
18	PIK3C3	prefrontal cortex	-0.21	0.0016	DOWN	RNA-Seq	26793951
19	PIK3R2	prefrontal cortex	0.5	0.000979	UP	RNA-Seq	26793951
17	PIK3R5	prefrontal cortex	0.48	0.00206	UP	RNA-Seq	26793951
22	PIM3	skin	-0.92	1.77e-06	DOWN	RNA-Seq	28068941
5	PITX1	skin	-2.02	0.000389	DOWN	RNA-Seq	28068941
22	PKDREJ	prefrontal cortex	-0.65	0.00148	DOWN	RNA-Seq	26793951
9	PKN3	prefrontal cortex	0.56	0.0011	UP	RNA-Seq	26793951
11	PKP3	skin	-0.64	0.000351	DOWN	RNA-Seq	28068941
3	PLA1A	prefrontal cortex	0.73	0.00109	UP	RNA-Seq	26793951
1	PLA2G2A	skin	-0.81	9.13e-08	DOWN	RNA-Seq	28068941
1	PLA2G2F	skin	-0.91	0.000202	DOWN	RNA-Seq	28068941
22	PLA2G3	skin	-0.77	0.000252	DOWN	RNA-Seq	28068941
9	PLAA	prefrontal cortex	-0.23	0.000362	DOWN	RNA-Seq	26793951
10	PLAC9	skin	-0.85	1.85e-05	DOWN	RNA-Seq	28068941
8	PLAG1	prefrontal cortex	-0.53	5.9e-05	DOWN	RNA-Seq	26793951
10	PLAU	skin	-0.7	0.000792	DOWN	RNA-Seq	28068941
19	PLAUR	prefrontal cortex	0.58	0.000652	UP	RNA-Seq	26793951
11	PLCB3	prefrontal cortex	0.4	0.00182	UP	RNA-Seq	26793951
20	PLCG1	prefrontal cortex	0.37	0.00136	UP	RNA-Seq	26793951
7	PLEKHA8	prefrontal cortex	-0.36	0.000353	DOWN	RNA-Seq	26793951
2	PLEKHB2	prefrontal cortex	-0.24	0.00309	DOWN	RNA-Seq	26793951
5	PLEKHG4B	prefrontal cortex	0.82	0.000235	UP	RNA-Seq	26793951
17	PLEKHH3	prefrontal cortex	0.36	0.00101	UP	RNA-Seq	26793951
19	PLEKHJ1	skin	-0.74	0.000561	DOWN	RNA-Seq	28068941
2	PLEKHM3	prefrontal cortex	-0.9	2.8e-05	DOWN	RNA-Seq	26793951
1	PLEKHN1	prefrontal cortex	0.75	0.00163	UP	RNA-Seq	26793951
9	PLIN2	skin	-0.93	1.38e-06	DOWN	RNA-Seq	28068941
19	PLIN3	skin	-0.57	0.00191	DOWN	RNA-Seq	28068941
19	PLIN4	prefrontal cortex	0.73	3.97e-05	UP	RNA-Seq	26793951
19	PLIN4	skin	-0.84	7.05e-05	DOWN	RNA-Seq	28068941
19	PLIN5	prefrontal cortex	0.54	0.00126	UP	RNA-Seq	26793951
19	PLIN5	skin	-1.39	5.17e-08	DOWN	RNA-Seq	28068941
4	PLK4	prefrontal cortex	-0.53	0.000621	DOWN	RNA-Seq	26793951
1	PLOD1	prefrontal cortex	0.52	8.52e-06	UP	RNA-Seq	26793951
4	PLRG1	prefrontal cortex	-0.28	0.000149	DOWN	RNA-Seq	26793951
X	PLS3	prefrontal cortex	-0.33	0.00193	DOWN	RNA-Seq	26793951
22	PMM1	skin	-0.73	0.000347	DOWN	RNA-Seq	28068941
8	PMP2	skin	0.75	0.000465	UP	RNA-Seq	28068941
7	PMS2	prefrontal cortex	-0.44	0.000526	DOWN	RNA-Seq	26793951
1	PMVK	skin	-0.84	6.98e-06	DOWN	RNA-Seq	28068941
19	PNKP	skin	-0.94	4.11e-05	DOWN	RNA-Seq	28068941
6	PNLDC1	skin	-1.07	7.32e-05	DOWN	RNA-Seq	28068941
14	PNP	prefrontal cortex	0.56	0.000533	UP	RNA-Seq	26793951
11	PNPLA2	prefrontal cortex	0.36	0.000419	UP	RNA-Seq	26793951
19	PNPLA6	prefrontal cortex	0.33	0.00131	UP	RNA-Seq	26793951
6	PNRC1	prefrontal cortex	0.4	3.16e-05	UP	RNA-Seq	26793951
5	POC5	prefrontal cortex	-0.47	0.00011	DOWN	RNA-Seq	26793951
11	POLD4	skin	-1.01	3.56e-07	DOWN	RNA-Seq	28068941
11	POLR2G	skin	-0.84	1.1e-06	DOWN	RNA-Seq	28068941
3	POLR2H	prefrontal cortex	0.29	8.03e-05	UP	RNA-Seq	26793951
3	POLR2H	skin	-0.68	0.000192	DOWN	RNA-Seq	28068941
7	POLR2J	skin	-1.06	4.62e-07	DOWN	RNA-Seq	28068941
11	POLR2L	skin	-0.7	0.000157	DOWN	RNA-Seq	28068941
12	POLR3B	prefrontal cortex	-0.23	0.000972	DOWN	RNA-Seq	26793951
19	POLRMT	skin	-0.79	0.000381	DOWN	RNA-Seq	28068941
13	POMP	skin	-0.73	4.4e-05	DOWN	RNA-Seq	28068941
12	POP5	skin	-0.7	0.000241	DOWN	RNA-Seq	28068941
7	POP7	skin	-0.96	1e-06	DOWN	RNA-Seq	28068941
-	PP12708	prefrontal cortex	-0.74	0.00193	DOWN	RNA-Seq	26793951
4	PPARGC1A	skin	0.7	0.00032	UP	RNA-Seq	28068941
4	PPBP	prefrontal cortex	0.81	0.000649	UP	RNA-Seq	26793951
10	PPIF	skin	-0.61	0.000762	DOWN	RNA-Seq	28068941
17	PPM1E	prefrontal cortex	-0.73	0.00101	DOWN	RNA-Seq	26793951
12	PPM1H	prefrontal cortex	-0.3	0.00101	DOWN	RNA-Seq	26793951
19	PPM1N	prefrontal cortex	0.41	0.000831	UP	RNA-Seq	26793951
1	PPP1R12B	prefrontal cortex	-0.34	0.000482	DOWN	RNA-Seq	26793951
19	PPP1R12C	skin	-0.69	0.000328	DOWN	RNA-Seq	28068941
11	PPP1R14B	skin	-0.92	0.000795	DOWN	RNA-Seq	28068941
8	PPP1R16A	skin	-0.92	0.00087	DOWN	RNA-Seq	28068941
6	PPP1R18	prefrontal cortex	0.49	0.000892	UP	RNA-Seq	26793951
20	PPP1R3D	prefrontal cortex	0.35	0.000712	UP	RNA-Seq	26793951
14	PPP1R3E	blood	0.15	0.000103	UP	RNA-seq	28916538
6	PPP1R3G	prefrontal cortex	0.52	0.00235	UP	RNA-Seq	26793951
16	PPP4C	prefrontal cortex	0.24	0.00162	UP	RNA-Seq	26793951
5	PPWD1	prefrontal cortex	-0.33	5.68e-05	DOWN	RNA-Seq	26793951
18	PQLC1	skin	-0.99	1.06e-06	DOWN	RNA-Seq	28068941
1	PRDX1	skin	-0.53	0.00167	DOWN	RNA-Seq	28068941
19	PRDX2	skin	-0.68	0.000171	DOWN	RNA-Seq	28068941
11	PRDX5	skin	-0.71	6.17e-05	DOWN	RNA-Seq	28068941
1	PRELP	prefrontal cortex	0.57	0.00183	UP	RNA-Seq	26793951
X	PRICKLE3	prefrontal cortex	0.45	0.00193	UP	RNA-Seq	26793951
6	PRICKLE4	prefrontal cortex	0.55	1.67e-06	UP	RNA-Seq	26793951
5	PRKAA1	prefrontal cortex	-0.38	0.000216	DOWN	RNA-Seq	26793951
19	PRKD2	prefrontal cortex	0.44	0.000363	UP	RNA-Seq	26793951
X	PRKX	prefrontal cortex	0.56	0.00101	UP	RNA-Seq	26793951
10	PRLHR	prefrontal cortex	-0.63	0.00221	DOWN	RNA-Seq	26793951
1	PRMT6	prefrontal cortex	-0.38	3.09e-05	DOWN	RNA-Seq	26793951
20	PRND	skin	1.25	3.01e-05	UP	RNA-Seq	28068941
2	PROC	prefrontal cortex	0.42	0.00108	UP	RNA-Seq	26793951
22	PRODH	skin	-0.6	0.0015	DOWN	RNA-Seq	28068941
3	PROK2	skin	-1.1	0.00193	DOWN	RNA-Seq	28068941
10	PROSER2	prefrontal cortex	0.55	0.000789	UP	RNA-Seq	26793951
19	PRR19	prefrontal cortex	0.37	0.00282	UP	RNA-Seq	26793951
3	PRR23A	skin	-1.07	1.44e-05	DOWN	RNA-Seq	28068941
16	PRR35	prefrontal cortex	-0.95	2.44e-05	DOWN	RNA-Seq	26793951
X	PRRG3	skin	0.96	3.93e-05	UP	RNA-Seq	28068941
9	PRSS3	skin	-0.74	0.000307	DOWN	RNA-Seq	28068941
1	PRUNE	prefrontal cortex	0.17	0.00209	UP	RNA-Seq	26793951
9	PRUNE2	prefrontal cortex	-0.36	0.00195	DOWN	RNA-Seq	26793951
19	PRX	prefrontal cortex	0.58	0.000222	UP	RNA-Seq	26793951
4	PSAPL1	skin	-0.79	2.26e-05	DOWN	RNA-Seq	28068941
8	PSCA	skin	-0.95	0.00114	DOWN	RNA-Seq	28068941
8	PSCA	skin	-0.95	0.00114	DOWN	RNA-Seq	28068941
19	PSG9	skin	-2.01	0.00113	DOWN	RNA-Seq	28068941
14	PSMA6	skin	-0.55	0.00222	DOWN	RNA-Seq	28068941
20	PSMA7	blood	-0.09	0.000184	DOWN	RNA-seq	28916538
6	PSMB1	skin	-0.81	2.76e-06	DOWN	RNA-Seq	28068941
1	PSMB2	prefrontal cortex	-0.18	0.00213	DOWN	RNA-Seq	26793951
17	PSMB3	skin	-0.76	1.22e-05	DOWN	RNA-Seq	28068941
17	PSMB6	skin	-0.92	1.43e-07	DOWN	RNA-Seq	28068941
6	PSMB9	skin	-0.71	0.000202	DOWN	RNA-Seq	28068941
6	PSMB9	skin	-0.71	0.000202	DOWN	RNA-Seq	28068941
6	PSMB9	skin	-0.71	0.000202	DOWN	RNA-Seq	28068941
6	PSMB9	skin	-0.71	0.000202	DOWN	RNA-Seq	28068941
6	PSMB9	skin	-0.71	0.000202	DOWN	RNA-Seq	28068941
6	PSMB9	skin	-0.71	0.000202	DOWN	RNA-Seq	28068941
6	PSMB9	skin	-0.71	0.000202	DOWN	RNA-Seq	28068941
6	PSMB9	skin	-0.71	0.000202	DOWN	RNA-Seq	28068941
17	PSMC5	skin	-0.62	0.000417	DOWN	RNA-Seq	28068941
12	PSMD9	skin	-0.57	0.0021	DOWN	RNA-Seq	28068941
7	PSMG3	skin	-0.85	1.07e-05	DOWN	RNA-Seq	28068941
6	PSMG4	skin	-0.76	5.4e-05	DOWN	RNA-Seq	28068941
6	PSORS1C2	skin	-0.73	0.000385	DOWN	RNA-Seq	28068941
6	PSORS1C2	skin	-0.73	0.000385	DOWN	RNA-Seq	28068941
6	PSORS1C2	skin	-0.73	0.000385	DOWN	RNA-Seq	28068941
6	PSORS1C2	skin	-0.73	0.000385	DOWN	RNA-Seq	28068941
6	PSORS1C2	skin	-0.73	0.000385	DOWN	RNA-Seq	28068941
6	PSORS1C2	skin	-0.73	0.000385	DOWN	RNA-Seq	28068941
19	PSPN	prefrontal cortex	0.4	0.000465	UP	RNA-Seq	26793951
15	PSTPIP1	blood	0.14	1.63e-06	UP	RNA-seq	28916538
19	PTBP1	prefrontal cortex	0.34	0.000215	UP	RNA-Seq	26793951
5	PTCD2	prefrontal cortex	-0.3	0.00112	DOWN	RNA-Seq	26793951
2	PTCD3	prefrontal cortex	-0.15	0.00251	DOWN	RNA-Seq	26793951
9	PTGDS	blood	0.49	4.35e-08	UP	RNA-seq	28916538
9	PTGDS	blood	0.34	2.26e-05	UP	RNA-seq	28916538
9	PTGES2	skin	-0.8	0.000577	DOWN	RNA-Seq	28068941
3	PTH1R	prefrontal cortex	0.53	0.000298	UP	RNA-Seq	26793951
19	PTOV1	prefrontal cortex	0.4	0.00024	UP	RNA-Seq	26793951
8	PTTG3P	skin	0.94	0.00161	UP	RNA-Seq	28068941
8	PUF60	skin	-0.76	1.66e-05	DOWN	RNA-Seq	28068941
8	PUF60	skin	-0.76	1.66e-05	DOWN	RNA-Seq	28068941
11	PUS3	prefrontal cortex	0.3	0.000189	UP	RNA-Seq	26793951
1	PUSL1	skin	-0.81	0.000249	DOWN	RNA-Seq	28068941
19	PVRL2	peripheral blood	1.72	2.66e-36	UP	RNA-seq	25475535
1	PVRL4	skin	-0.53	0.00202	DOWN	RNA-Seq	28068941
12	PWP1	prefrontal cortex	-0.21	0.00307	DOWN	RNA-Seq	26793951
10	PWWP2B	skin	-1	0.00012	DOWN	RNA-Seq	28068941
6	PXDC1	prefrontal cortex	0.46	0.00238	UP	RNA-Seq	26793951
8	PXDNL	skin	0.87	0.000335	UP	RNA-Seq	28068941
12	PXMP2	skin	-0.82	3.42e-05	DOWN	RNA-Seq	28068941
1	PYGO2	prefrontal cortex	0.19	0.00267	UP	RNA-Seq	26793951
12	PYROXD1	prefrontal cortex	-0.47	0.000831	DOWN	RNA-Seq	26793951
12	PZP	prefrontal cortex	-0.65	0.0028	DOWN	RNA-Seq	26793951
19	QTRT1	skin	-0.84	4.55e-05	DOWN	RNA-Seq	28068941
3	QTRTD1	prefrontal cortex	-0.25	0.00194	DOWN	RNA-Seq	26793951
10	RAB18	blood	-0.15	0.000255	DOWN	RNA-seq	28916538
13	RAB20	skin	-0.99	0.000267	DOWN	RNA-Seq	28068941
5	RAB24	prefrontal cortex	0.41	4.87e-06	UP	RNA-Seq	26793951
5	RAB24	skin	-0.75	6.2e-05	DOWN	RNA-Seq	28068941
1	RAB3B	prefrontal cortex	-0.53	0.00302	DOWN	RNA-Seq	26793951
11	RAB3IL1	prefrontal cortex	0.51	0.000137	UP	RNA-Seq	26793951
X	RAB40A	prefrontal cortex	-0.52	0.000501	DOWN	RNA-Seq	26793951
16	RAB40C	skin	-0.83	1.14e-05	DOWN	RNA-Seq	28068941
3	RAD18	prefrontal cortex	-0.26	0.00283	DOWN	RNA-Seq	26793951
2	RAMP1	prefrontal cortex	0.42	0.000479	UP	RNA-Seq	26793951
17	RAMP2	skin	-0.64	0.00111	DOWN	RNA-Seq	28068941
7	RAMP3	prefrontal cortex	0.49	0.00116	UP	RNA-Seq	26793951
12	RAPGEF3	skin	-0.62	0.00129	DOWN	RNA-Seq	28068941
6	RARS2	prefrontal cortex	-0.22	0.00118	DOWN	RNA-Seq	26793951
3	RASA2	blood	-0.15	0.000146	DOWN	RNA-seq	28916538
7	RASA4	prefrontal cortex	0.32	0.00195	UP	RNA-Seq	26793951
15	RASGRF1	prefrontal cortex	-0.39	0.00271	DOWN	RNA-Seq	26793951
3	RASSF1	skin	-0.73	6.33e-05	DOWN	RNA-Seq	28068941
3	RASSF1	skin	-0.73	6.33e-05	DOWN	RNA-Seq	28068941
11	RASSF7	skin	-1.07	3.12e-07	DOWN	RNA-Seq	28068941
19	RAX2	prefrontal cortex	0.75	0.00144	UP	RNA-Seq	26793951
1	RBBP4	prefrontal cortex	-0.27	0.00212	DOWN	RNA-Seq	26793951
20	RBBP9	prefrontal cortex	-0.34	7.56e-07	DOWN	RNA-Seq	26793951
14	RBM25	prefrontal cortex	-0.32	0.00117	DOWN	RNA-Seq	26793951
X	RBM3	prefrontal cortex	-0.5	0.00091	DOWN	RNA-Seq	26793951
2	RBM45	prefrontal cortex	-0.28	0.000144	DOWN	RNA-Seq	26793951
X	RBMX	prefrontal cortex	-0.26	0.0013	DOWN	RNA-Seq	26793951
22	RBX1	skin	-0.65	0.000192	DOWN	RNA-Seq	28068941
1	RCAN3	prefrontal cortex	-0.83	0.000239	DOWN	RNA-Seq	26793951
1	RCC1	prefrontal cortex	0.74	2.86e-08	UP	RNA-Seq	26793951
11	RCE1	prefrontal cortex	0.33	0.00224	UP	RNA-Seq	26793951
19	RCN3	prefrontal cortex	0.45	0.00022	UP	RNA-Seq	26793951
1	RCOR3	prefrontal cortex	-0.27	0.0025	DOWN	RNA-Seq	26793951
8	REEP4	skin	-0.76	5.64e-05	DOWN	RNA-Seq	28068941
11	RELA	prefrontal cortex	0.54	1.49e-05	UP	RNA-Seq	26793951
7	RELN	skin	0.64	0.000948	UP	RNA-Seq	28068941
12	REP15	prefrontal cortex	0.72	0.000461	UP	RNA-Seq	26793951
6	REPS1	prefrontal cortex	-0.31	0.000725	DOWN	RNA-Seq	26793951
13	RFC3	prefrontal cortex	-0.4	0.0017	DOWN	RNA-Seq	26793951
17	RFNG	prefrontal cortex	0.39	7.45e-05	UP	RNA-Seq	26793951
17	RFNG	skin	-0.93	1.02e-05	DOWN	RNA-Seq	28068941
19	RFX1	prefrontal cortex	0.33	0.00131	UP	RNA-Seq	26793951
19	RFX2	prefrontal cortex	0.41	0.00178	UP	RNA-Seq	26793951
19	RFXANK	skin	-0.72	0.000404	DOWN	RNA-Seq	28068941
19	RFXANK	skin	-0.72	0.000404	DOWN	RNA-Seq	28068941
6	RGL2	prefrontal cortex	0.26	0.002	UP	RNA-Seq	26793951
19	RGL3	prefrontal cortex	0.54	0.00049	UP	RNA-Seq	26793951
10	RGS10	skin	-0.74	0.000142	DOWN	RNA-Seq	28068941
1	RGS8	prefrontal cortex	-0.99	2.35e-05	DOWN	RNA-Seq	26793951
16	RHBDF1	prefrontal cortex	0.36	0.0029	UP	RNA-Seq	26793951
17	RHBDF2	prefrontal cortex	0.72	5.14e-05	UP	RNA-Seq	26793951
1	RHBG	prefrontal cortex	-0.85	7.61e-05	DOWN	RNA-Seq	26793951
1	RHBG	skin	-0.82	0.000112	DOWN	RNA-Seq	28068941
2	RHOB	skin	-0.72	0.000161	DOWN	RNA-Seq	28068941
1	RHOC	skin	-0.59	0.000632	DOWN	RNA-Seq	28068941
11	RHOG	blood	0.11	5.3e-07	UP	RNA-seq	28916538
16	RHOT2	skin	-0.79	1.99e-05	DOWN	RNA-Seq	28068941
15	RHOV	skin	-0.54	0.00214	DOWN	RNA-Seq	28068941
6	RIMS1	skin	0.64	0.002	UP	RNA-Seq	28068941
11	RIN1	skin	-0.83	9.13e-05	DOWN	RNA-Seq	28068941
7	RINT1	prefrontal cortex	-0.31	8.67e-05	DOWN	RNA-Seq	26793951
1	RLF	prefrontal cortex	-0.29	0.000577	DOWN	RNA-Seq	26793951
14	RNASE2	skin	-0.82	0.00198	DOWN	RNA-Seq	28068941
14	RNASE7	skin	-0.69	0.000142	DOWN	RNA-Seq	28068941
6	RNASET2	prefrontal cortex	0.37	0.00219	UP	RNA-Seq	26793951
19	RNF126	skin	-0.7	0.000485	DOWN	RNA-Seq	28068941
18	RNF138	blood	0.21	0.000274	UP	RNA-seq	28916538
4	RNF150	prefrontal cortex	-0.64	0.00109	DOWN	RNA-Seq	26793951
16	RNF166	prefrontal cortex	0.21	0.00188	UP	RNA-Seq	26793951
4	RNF175	skin	-1.05	0.00114	DOWN	RNA-Seq	28068941
2	RNF181	skin	-0.6	0.00109	DOWN	RNA-Seq	28068941
20	RNF24	blood	0.14	0.000205	UP	RNA-seq	28916538
11	RNH1	skin	-0.94	2.55e-07	DOWN	RNA-Seq	28068941
16	RNPS1	skin	-0.63	0.000414	DOWN	RNA-Seq	28068941
1	ROBLD3	skin	-0.66	0.000509	DOWN	RNA-Seq	28068941
3	ROBO1	prefrontal cortex	-0.29	0.00258	DOWN	RNA-Seq	26793951
20	ROMO1	skin	-1.23	3.88e-11	DOWN	RNA-Seq	28068941
9	RORB	skin	0.79	0.000485	UP	RNA-Seq	28068941
-	RP11-192H23.4	prefrontal cortex	0.45	0.000235	UP	RNA-Seq	26793951
-	RP11-514O12.4	prefrontal cortex	0.94	5.03e-05	UP	RNA-Seq	26793951
-	RP11-676J12.7	prefrontal cortex	0.71	0.00289	UP	RNA-Seq	26793951
-	RP11-9B6.1	prefrontal cortex	-0.7	0.00284	DOWN	RNA-Seq	26793951
7	RP9	skin	-0.6	0.00144	DOWN	RNA-Seq	28068941
1	RPE65	prefrontal cortex	-0.73	0.00206	DOWN	RNA-Seq	26793951
1	RPL11	skin	-0.72	2.94e-05	DOWN	RNA-Seq	28068941
16	RPL13	skin	-0.57	0.00141	DOWN	RNA-Seq	28068941
13	RPL21	skin	-0.56	0.00113	DOWN	RNA-Seq	28068941
1	RPL21P28	skin	-0.56	0.00113	DOWN	RNA-Seq	28068941
1	RPL22	skin	-0.54	0.00182	DOWN	RNA-Seq	28068941
3	RPL22L1	skin	-0.89	1.03e-06	DOWN	RNA-Seq	28068941
17	RPL23A	skin	-0.57	0.00106	DOWN	RNA-Seq	28068941
17	RPL27	skin	-0.64	0.000208	DOWN	RNA-Seq	28068941
11	RPL27A	skin	-1.02	7.92e-09	DOWN	RNA-Seq	28068941
3	RPL29	skin	-0.97	3.17e-08	DOWN	RNA-Seq	28068941
9	RPL35	skin	-0.62	0.000305	DOWN	RNA-Seq	28068941
X	RPL36A	skin	-0.63	0.00179	DOWN	RNA-Seq	28068941
2	RPL37A	skin	-1	7.74e-09	DOWN	RNA-Seq	28068941
X	RPL39	skin	-0.92	2.12e-07	DOWN	RNA-Seq	28068941
3	RPL39L	skin	-1.21	0.000175	DOWN	RNA-Seq	28068941
12	RPL41	skin	-0.75	4.18e-05	DOWN	RNA-Seq	28068941
8	RPL8	skin	-0.52	0.00224	DOWN	RNA-Seq	28068941
12	RPLP0	skin	-0.79	1.78e-06	DOWN	RNA-Seq	28068941
15	RPLP1	skin	-0.76	8.02e-06	DOWN	RNA-Seq	28068941
6	RPS12	skin	-0.75	8.07e-06	DOWN	RNA-Seq	28068941
5	RPS14	blood	-0.07	0.000173	DOWN	RNA-seq	28916538
22	RPS19BP1	skin	-1.14	6.69e-08	DOWN	RNA-Seq	28068941
8	RPS20	skin	-0.65	9.76e-05	DOWN	RNA-Seq	28068941
14	RPS29	skin	-0.71	5.31e-05	DOWN	RNA-Seq	28068941
Y	RPS4Y1	skin	-0.94	7.01e-08	DOWN	RNA-Seq	28068941
19	RPS9	skin	-0.73	2.34e-05	DOWN	RNA-Seq	28068941
19	RPS9	skin	-0.73	2.34e-05	DOWN	RNA-Seq	28068941
19	RPS9	skin	-0.73	2.34e-05	DOWN	RNA-Seq	28068941
16	RRAD	prefrontal cortex	0.78	0.000415	UP	RNA-Seq	26793951
3	RRP9	skin	-0.73	0.0014	DOWN	RNA-Seq	28068941
17	RSAD1	prefrontal cortex	0.28	0.000187	UP	RNA-Seq	26793951
16	RSPRY1	prefrontal cortex	-0.21	0.00211	DOWN	RNA-Seq	26793951
3	RTP4	prefrontal cortex	-0.45	0.00243	DOWN	RNA-Seq	26793951
18	RTTN	prefrontal cortex	-0.37	0.00193	DOWN	RNA-Seq	26793951
5	RUFY1	prefrontal cortex	0.21	0.00205	UP	RNA-Seq	26793951
10	RUFY2	prefrontal cortex	-0.34	9.49e-05	DOWN	RNA-Seq	26793951
19	RUVBL2	skin	-0.61	0.000708	DOWN	RNA-Seq	28068941
5	RXFP3	prefrontal cortex	-0.81	0.00075	DOWN	RNA-Seq	26793951
1	S100A12	prefrontal cortex	1.1	3.32e-06	UP	RNA-Seq	26793951
1	S100A12	skin	-1.63	2.3e-07	DOWN	RNA-Seq	28068941
1	S100A16	skin	-0.57	0.00171	DOWN	RNA-Seq	28068941
1	S100A2	skin	-0.95	1.36e-07	DOWN	RNA-Seq	28068941
1	S100A4	skin	-0.89	8.43e-08	DOWN	RNA-Seq	28068941
1	S100A6	skin	-1.17	9.7e-12	DOWN	RNA-Seq	28068941
1	S100A7	prefrontal cortex	0.77	0.000398	UP	RNA-Seq	26793951
1	S100A7A	skin	1.12	6.66e-05	UP	RNA-Seq	28068941
1	S100A9	skin	-0.92	5.86e-05	DOWN	RNA-Seq	28068941
11	SAA1	skin	-2.75	7.36e-37	DOWN	RNA-Seq	28068941
11	SAA2	skin	-1.65	1.6e-09	DOWN	RNA-Seq	28068941
11	SAC3D1	skin	-1.08	9.42e-07	DOWN	RNA-Seq	28068941
19	SAFB2	prefrontal cortex	0.4	3.28e-05	UP	RNA-Seq	26793951
18	SALL3	prefrontal cortex	0.49	0.00274	UP	RNA-Seq	26793951
19	SAMD1	prefrontal cortex	0.35	0.0026	UP	RNA-Seq	26793951
1	SAMD13	prefrontal cortex	-0.51	0.00035	DOWN	RNA-Seq	26793951
7	SAP25	skin	-1.54	0.00143	DOWN	RNA-Seq	28068941
6	SASH1	prefrontal cortex	0.36	0.00284	UP	RNA-Seq	26793951
19	SBNO2	prefrontal cortex	0.48	0.000669	UP	RNA-Seq	26793951
19	SBSN	skin	-0.74	3.43e-05	DOWN	RNA-Seq	28068941
11	SC5D	prefrontal cortex	-0.34	0.00107	DOWN	RNA-Seq	26793951
6	SCAF8	prefrontal cortex	-0.25	0.000228	DOWN	RNA-Seq	26793951
1	SCAMP3	skin	-0.77	3.78e-05	DOWN	RNA-Seq	28068941
X	SCARNA9L	skin	1.42	0.00132	UP	RNA-Seq	28068941
4	SCFD2	prefrontal cortex	-0.22	0.00199	DOWN	RNA-Seq	26793951
2	SCG2	skin	1.15	7.33e-05	UP	RNA-Seq	28068941
11	SCGB2A2	skin	-0.62	0.000115	DOWN	RNA-Seq	28068941
4	SCLT1	prefrontal cortex	-0.47	4.08e-06	DOWN	RNA-Seq	26793951
3	SCN11A	prefrontal cortex	-0.5	0.000878	DOWN	RNA-Seq	26793951
11	SCN2B	skin	1.17	0.000177	UP	RNA-Seq	28068941
3	SCN5A	skin	0.81	0.000402	UP	RNA-Seq	28068941
3	SCN5A	skin	0.81	0.000402	UP	RNA-Seq	28068941
12	SCN8A	prefrontal cortex	-0.69	0.000444	DOWN	RNA-Seq	26793951
22	SCO2	prefrontal cortex	0.29	0.00264	UP	RNA-Seq	26793951
2	SCRN3	prefrontal cortex	-0.38	9.94e-06	DOWN	RNA-Seq	26793951
11	SCT	prefrontal cortex	0.97	3.15e-05	UP	RNA-Seq	26793951
1	SCYL3	prefrontal cortex	-0.34	0.000836	DOWN	RNA-Seq	26793951
20	SDCBP2	skin	-0.97	1.47e-07	DOWN	RNA-Seq	28068941
9	SDCCAG3	prefrontal cortex	0.25	0.0021	UP	RNA-Seq	26793951
17	SDF2	skin	-0.81	9.18e-06	DOWN	RNA-Seq	28068941
22	SDF2L1	skin	-0.76	0.000974	DOWN	RNA-Seq	28068941
9	SEC61B	skin	-0.86	2.33e-06	DOWN	RNA-Seq	28068941
7	SEC61G	skin	-0.91	6.77e-07	DOWN	RNA-Seq	28068941
3	SEMA3F	prefrontal cortex	0.71	5.41e-05	UP	RNA-Seq	26793951
5	SEMA5A	prefrontal cortex	-0.3	0.00262	DOWN	RNA-Seq	26793951
15	SEMA6D	prefrontal cortex	-0.29	0.00146	DOWN	RNA-Seq	26793951
6	SENP6	prefrontal cortex	-0.29	0.000301	DOWN	RNA-Seq	26793951
19	SEPW1	skin	-0.61	0.00114	DOWN	RNA-Seq	28068941
15	SERF2	skin	-0.54	0.00182	DOWN	RNA-Seq	28068941
14	SERPINA1	skin	-0.62	0.000528	DOWN	RNA-Seq	28068941
1	SERPINC1	prefrontal cortex	0.66	0.00207	UP	RNA-Seq	26793951
13	SERPINE3	prefrontal cortex	-0.45	0.00239	DOWN	RNA-Seq	26793951
17	SERPINF2	prefrontal cortex	0.71	4.06e-05	UP	RNA-Seq	26793951
17	SERPINF2	skin	-1.82	2.39e-06	DOWN	RNA-Seq	28068941
11	SERPINH1	prefrontal cortex	1.29	3.9e-09	UP	RNA-Seq	26793951
19	SERTAD1	prefrontal cortex	0.54	0.000669	UP	RNA-Seq	26793951
19	SERTAD1	skin	-0.63	0.0017	DOWN	RNA-Seq	28068941
1	SERTAD4	prefrontal cortex	-0.37	0.00258	DOWN	RNA-Seq	26793951
1	SESN2	prefrontal cortex	0.48	5.67e-05	UP	RNA-Seq	26793951
2	SESTD1	prefrontal cortex	-0.31	0.00235	DOWN	RNA-Seq	26793951
6	SF3B5	skin	-0.62	0.00106	DOWN	RNA-Seq	28068941
1	SFPQ	prefrontal cortex	-0.22	0.00285	DOWN	RNA-Seq	26793951
6	SFT2D1	skin	-0.61	0.00143	DOWN	RNA-Seq	28068941
10	SFTPA2	prefrontal cortex	-0.66	0.001	DOWN	RNA-Seq	26793951
10	SFTPD	skin	-1.8	3.94e-09	DOWN	RNA-Seq	28068941
10	SFXN2	prefrontal cortex	-0.38	0.00133	DOWN	RNA-Seq	26793951
17	SGSH	skin	-0.57	0.00207	DOWN	RNA-Seq	28068941
22	SGSM3	skin	-0.71	0.000301	DOWN	RNA-Seq	28068941
7	SH2B2	blood	0.15	2.77e-05	UP	RNA-seq	28916538
9	SH2D3C	blood	0.2	6.12e-05	UP	RNA-seq	28916538
2	SH2D6	prefrontal cortex	0.52	0.00306	UP	RNA-Seq	26793951
4	SH3TC1	prefrontal cortex	0.6	0.000511	UP	RNA-Seq	26793951
11	SHANK2	skin	0.64	0.000654	UP	RNA-Seq	28068941
9	SHC3	prefrontal cortex	-0.67	0.0013	DOWN	RNA-Seq	26793951
7	SHFM1	skin	-0.92	2.27e-07	DOWN	RNA-Seq	28068941
4	SHISA3	prefrontal cortex	0.69	0.000504	UP	RNA-Seq	26793951
19	SIGLEC8	prefrontal cortex	0.71	0.000235	UP	RNA-Seq	26793951
11	SIPA1	prefrontal cortex	0.47	0.000369	UP	RNA-Seq	26793951
20	SIRPB1	skin	-1.1	1.15e-11	DOWN	RNA-Seq	28068941
12	SIRT4	prefrontal cortex	0.42	0.000477	UP	RNA-Seq	26793951
17	SIRT7	prefrontal cortex	0.44	7.13e-05	UP	RNA-Seq	26793951
14	SIX1	prefrontal cortex	0.81	0.000462	UP	RNA-Seq	26793951
2	SIX2	prefrontal cortex	0.73	0.00211	UP	RNA-Seq	26793951
14	SIX4	prefrontal cortex	0.56	0.000657	UP	RNA-Seq	26793951
14	SIX4	skin	0.68	0.00105	UP	RNA-Seq	28068941
19	SIX5	prefrontal cortex	0.57	0.000628	UP	RNA-Seq	26793951
8	SLA	blood	0.15	1.48e-05	UP	RNA-seq	28916538
2	SLC11A1	prefrontal cortex	0.7	0.00181	UP	RNA-Seq	26793951
2	SLC11A1	skin	-1.05	5.43e-05	DOWN	RNA-Seq	28068941
5	SLC12A7	prefrontal cortex	0.52	9.62e-05	UP	RNA-Seq	26793951
18	SLC14A1	skin	0.89	2.05e-05	UP	RNA-Seq	28068941
10	SLC16A12	prefrontal cortex	0.74	0.00188	UP	RNA-Seq	26793951
20	SLC17A9	prefrontal cortex	0.59	8.34e-05	UP	RNA-Seq	26793951
2	SLC19A3	prefrontal cortex	0.48	0.000936	UP	RNA-Seq	26793951
1	SLC1A7	prefrontal cortex	0.98	3.04e-05	UP	RNA-Seq	26793951
8	SLC20A2	prefrontal cortex	-0.24	0.0015	DOWN	RNA-Seq	26793951
6	SLC22A2	prefrontal cortex	0.77	0.000896	UP	RNA-Seq	26793951
16	SLC22A31	prefrontal cortex	-0.73	0.000296	DOWN	RNA-Seq	26793951
15	SLC24A1	prefrontal cortex	-0.25	0.00201	DOWN	RNA-Seq	26793951
3	SLC25A20	skin	-0.74	0.00158	DOWN	RNA-Seq	28068941
14	SLC25A29	skin	-0.69	0.000154	DOWN	RNA-Seq	28068941
19	SLC25A41	prefrontal cortex	0.48	0.00151	UP	RNA-Seq	26793951
19	SLC25A42	prefrontal cortex	0.22	0.00248	UP	RNA-Seq	26793951
5	SLC25A48	prefrontal cortex	0.71	5.21e-05	UP	RNA-Seq	26793951
X	SLC25A5	skin	-0.53	0.00151	DOWN	RNA-Seq	28068941
7	SLC26A3	skin	-1.45	4.26e-05	DOWN	RNA-Seq	28068941
3	SLC26A6	prefrontal cortex	0.47	0.00033	UP	RNA-Seq	26793951
8	SLC26A7	skin	0.74	0.0012	UP	RNA-Seq	28068941
12	SLC2A14	peripheral blood	0.61	0.04	UP	RNA-seq	25475535
4	SLC30A9	prefrontal cortex	-0.32	0.00292	DOWN	RNA-Seq	26793951
4	SLC34A2	skin	0.96	2.19e-06	UP	RNA-Seq	28068941
X	SLC35A2	skin	-0.71	9.09e-05	DOWN	RNA-Seq	28068941
9	SLC35D2	skin	-0.58	0.00132	DOWN	RNA-Seq	28068941
6	SLC35D3	prefrontal cortex	-0.86	0.00031	DOWN	RNA-Seq	26793951
12	SLC35E3	prefrontal cortex	-0.31	0.000749	DOWN	RNA-Seq	26793951
12	SLC38A2	prefrontal cortex	0.48	0.000661	UP	RNA-Seq	26793951
18	SLC39A6	blood	0.23	2.52e-05	UP	RNA-seq	28916538
14	SLC39A9	prefrontal cortex	-0.17	1.83e-05	DOWN	RNA-Seq	26793951
11	SLC3A2	prefrontal cortex	0.46	4.13e-06	UP	RNA-Seq	26793951
11	SLC43A3	prefrontal cortex	0.53	0.000233	UP	RNA-Seq	26793951
20	SLC4A11	prefrontal cortex	0.65	1.33e-05	UP	RNA-Seq	26793951
12	SLC4A8	prefrontal cortex	-0.66	1.97e-06	DOWN	RNA-Seq	26793951
20	SLC52A3	prefrontal cortex	0.64	0.00154	UP	RNA-Seq	26793951
21	SLC5A3	prefrontal cortex	0.69	1.21e-05	UP	RNA-Seq	26793951
2	SLC5A7	prefrontal cortex	-0.81	0.000386	DOWN	RNA-Seq	26793951
12	SLC6A12	prefrontal cortex	0.75	2.86e-09	UP	RNA-Seq	26793951
12	SLC6A13	prefrontal cortex	0.53	0.000254	UP	RNA-Seq	26793951
3	SLC7A14	prefrontal cortex	-0.78	7.09e-05	DOWN	RNA-Seq	26793951
8	SLC7A2	prefrontal cortex	0.59	0.00207	UP	RNA-Seq	26793951
16	SLC7A5	prefrontal cortex	0.42	0.000712	UP	RNA-Seq	26793951
19	SLC7A9	prefrontal cortex	0.94	4.81e-07	UP	RNA-Seq	26793951
2	SLC9A4	skin	0.78	0.000496	UP	RNA-Seq	28068941
X	SLC9A7	prefrontal cortex	-0.77	8.58e-05	DOWN	RNA-Seq	26793951
20	SLCO4A1	prefrontal cortex	0.93	5.71e-06	UP	RNA-Seq	26793951
20	SLCO4A1	skin	-0.85	3.7e-05	DOWN	RNA-Seq	28068941
17	SLFN5	prefrontal cortex	-0.53	0.000117	DOWN	RNA-Seq	26793951
1	SLFNL1	prefrontal cortex	0.64	0.00045	UP	RNA-Seq	26793951
18	SLMO1	prefrontal cortex	0.25	0.00291	UP	RNA-Seq	26793951
20	SLPI	prefrontal cortex	0.87	0.000267	UP	RNA-Seq	26793951
20	SLPI	skin	-0.58	0.000951	DOWN	RNA-Seq	28068941
8	SLURP1	skin	-0.97	5.09e-09	DOWN	RNA-Seq	28068941
7	SMARCD3	prefrontal cortex	0.29	0.00289	UP	RNA-Seq	26793951
11	SMCO4	prefrontal cortex	0.4	0.00113	UP	RNA-Seq	26793951
17	SMCR7	skin	-0.65	0.000767	DOWN	RNA-Seq	28068941
4	SMIM14	prefrontal cortex	-0.3	0.000677	DOWN	RNA-Seq	26793951
7	SMO	prefrontal cortex	0.48	0.00127	UP	RNA-Seq	26793951
20	SMOX	prefrontal cortex	0.54	2.76e-05	UP	RNA-Seq	26793951
22	SMTN	prefrontal cortex	0.83	6.27e-06	UP	RNA-Seq	26793951
4	SNCA	peripheral blood	-0.43	0.03	DOWN	RNA-seq	25475535
17	SNF8	skin	-0.78	2.54e-05	DOWN	RNA-Seq	28068941
6	SNHG5	skin	-0.63	0.000499	DOWN	RNA-Seq	28068941
4	SNHG8	skin	-1.01	2.06e-08	DOWN	RNA-Seq	28068941
16	SNHG9	skin	-1.91	5.47e-09	DOWN	RNA-Seq	28068941
16	SNN	skin	-0.55	0.00143	DOWN	RNA-Seq	28068941
16	SNRNP25	skin	-0.63	0.00101	DOWN	RNA-Seq	28068941
19	SNRNP70	skin	-0.73	8.04e-05	DOWN	RNA-Seq	28068941
20	SNRPB	skin	-0.75	0.000114	DOWN	RNA-Seq	28068941
19	SNRPD2	skin	-0.69	0.000103	DOWN	RNA-Seq	28068941
22	SNRPD3	skin	-0.68	0.000176	DOWN	RNA-Seq	28068941
1	SNRPE	skin	-0.55	0.002	DOWN	RNA-Seq	28068941
12	SNRPF	skin	-0.82	1.05e-05	DOWN	RNA-Seq	28068941
3	SNTN	prefrontal cortex	-0.72	0.00129	DOWN	RNA-Seq	26793951
11	SNX15	skin	-0.64	0.000451	DOWN	RNA-Seq	28068941
3	SNX4	prefrontal cortex	-0.3	0.00055	DOWN	RNA-Seq	26793951
16	SOLH	skin	-0.93	0.000129	DOWN	RNA-Seq	28068941
20	SOX12	prefrontal cortex	0.32	0.00184	UP	RNA-Seq	26793951
3	SOX2OT	skin	0.85	0.000683	UP	RNA-Seq	28068941
10	SPAG6	prefrontal cortex	-0.73	0.000744	DOWN	RNA-Seq	26793951
17	SPAG7	skin	-0.73	0.000136	DOWN	RNA-Seq	28068941
14	SPATA7	prefrontal cortex	-0.35	0.00143	DOWN	RNA-Seq	26793951
3	SPCS1	prefrontal cortex	-0.22	0.00262	DOWN	RNA-Seq	26793951
6	SPDEF	skin	-0.79	0.00157	DOWN	RNA-Seq	28068941
22	SPECC1L	prefrontal cortex	0.29	4.72e-05	UP	RNA-Seq	26793951
15	SPG11	prefrontal cortex	-0.24	0.000376	DOWN	RNA-Seq	26793951
17	SPHK1	skin	-0.59	0.00226	DOWN	RNA-Seq	28068941
2	SPHKAP	skin	0.75	0.0018	UP	RNA-Seq	28068941
5	SPINK1	skin	-1.61	4e-06	DOWN	RNA-Seq	28068941
3	SPINK8	prefrontal cortex	0.85	0.000173	UP	RNA-Seq	26793951
15	SPINT1	skin	-0.56	0.0012	DOWN	RNA-Seq	28068941
19	SPINT2	skin	-0.76	1.67e-05	DOWN	RNA-Seq	28068941
17	SPNS2	skin	-0.62	0.00105	DOWN	RNA-Seq	28068941
[truncated: 379 more rows]
